# Supplementary material for: The DNA sequence and comparative analysis of human chromosome 10
Source: Springer Nature journal article supplement (doi:10.1038/nature02462), 2004-05-01

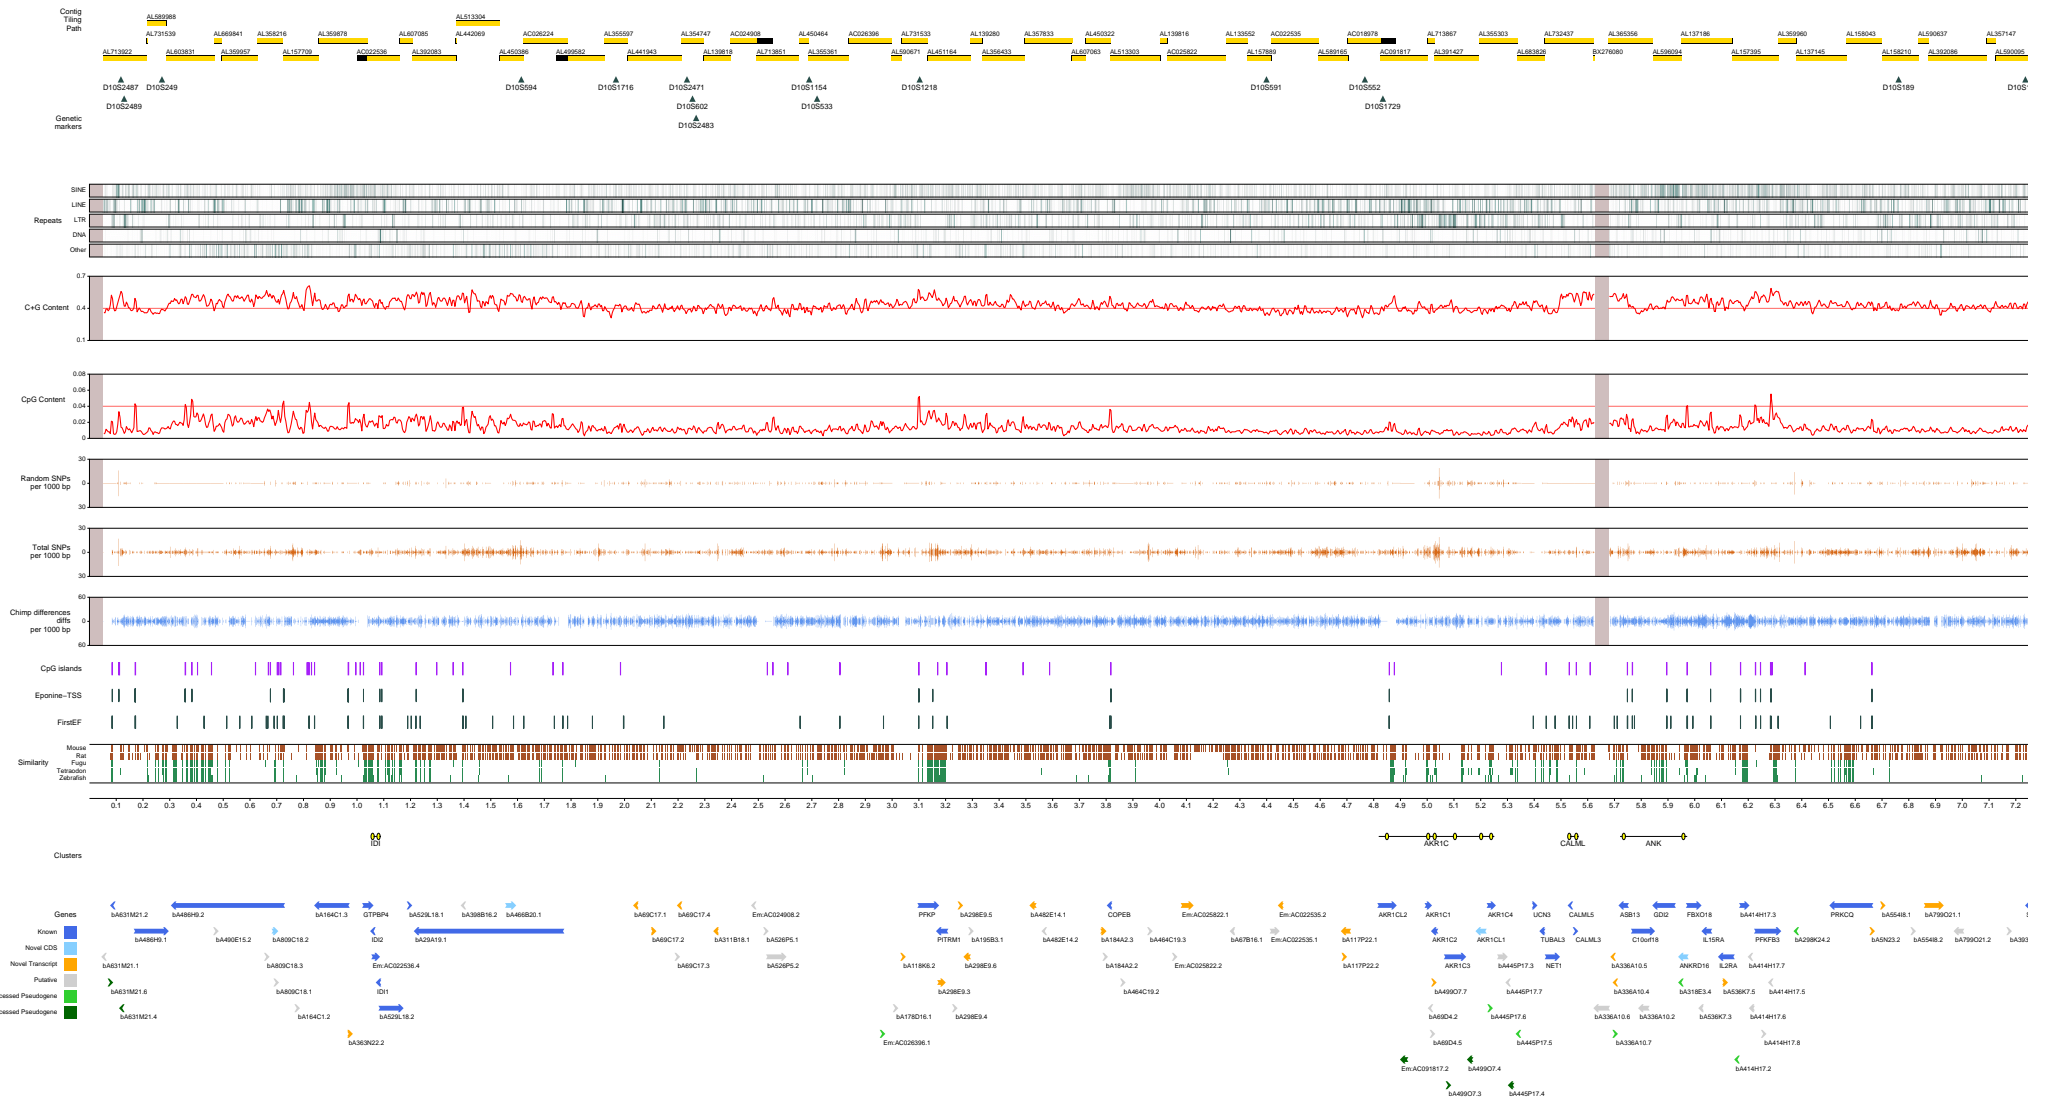

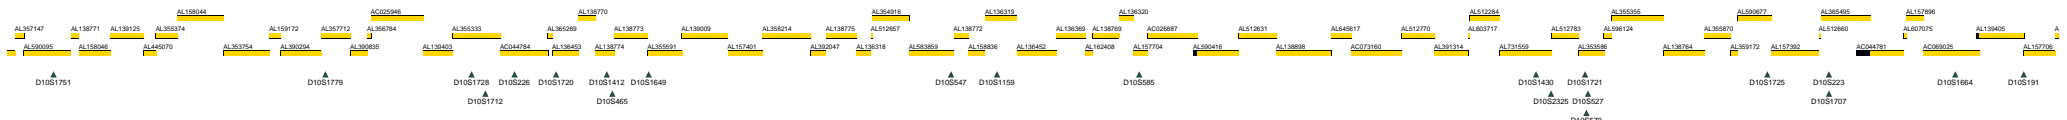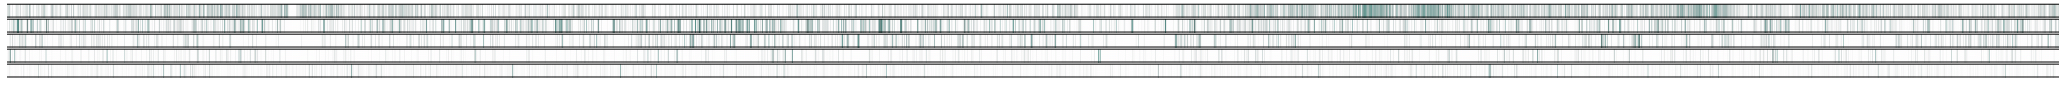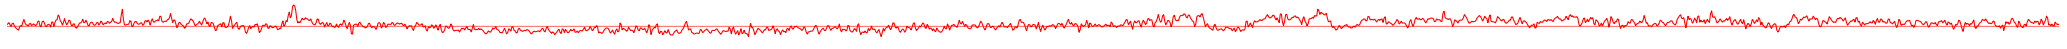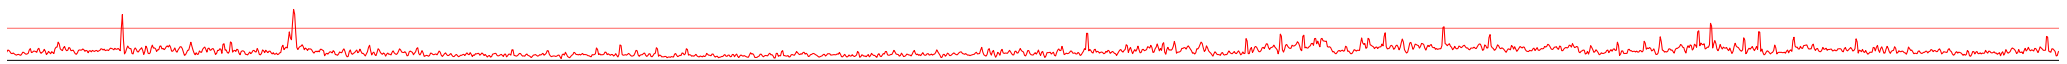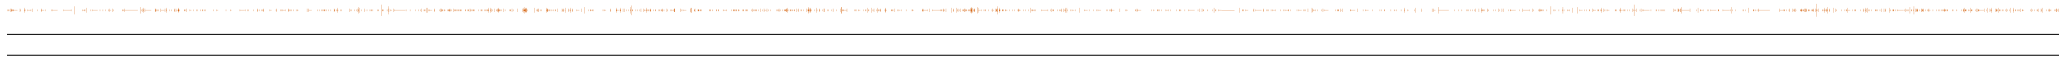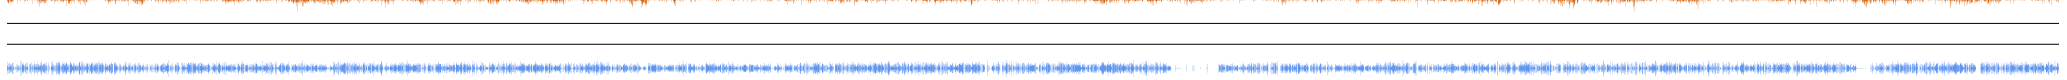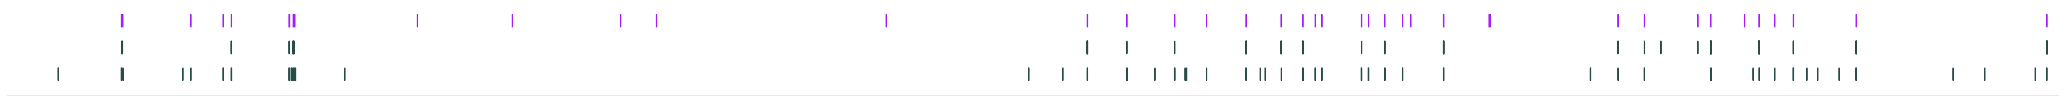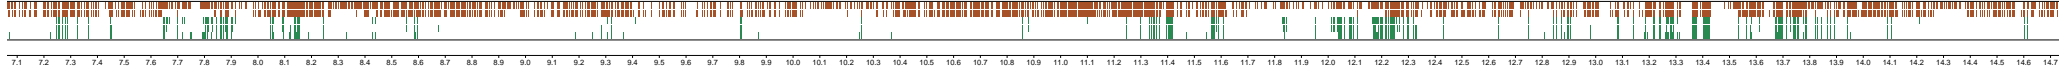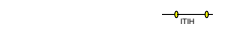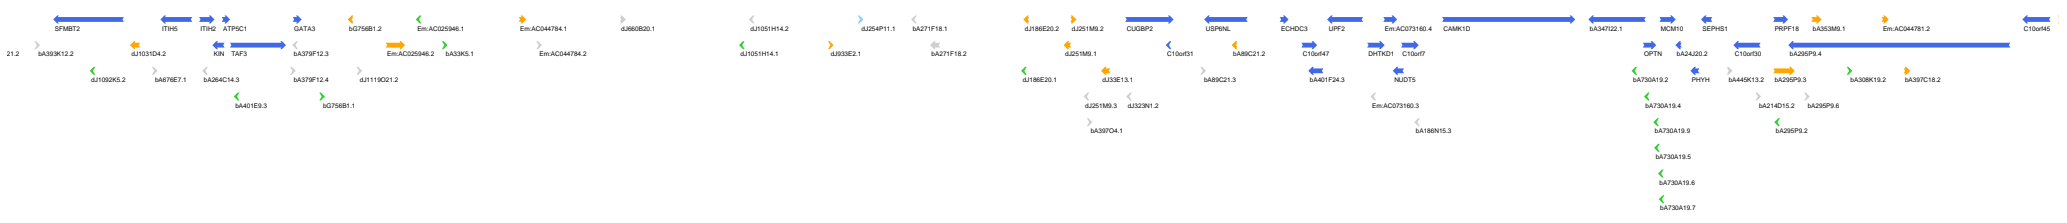

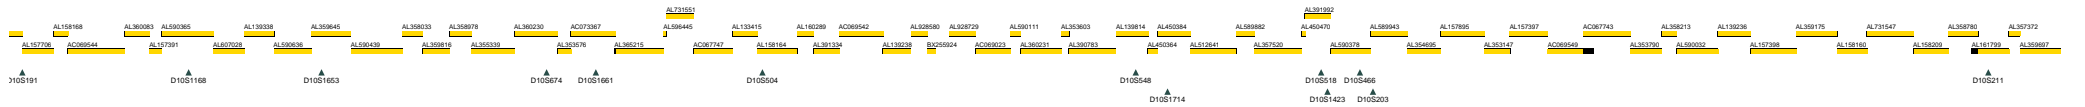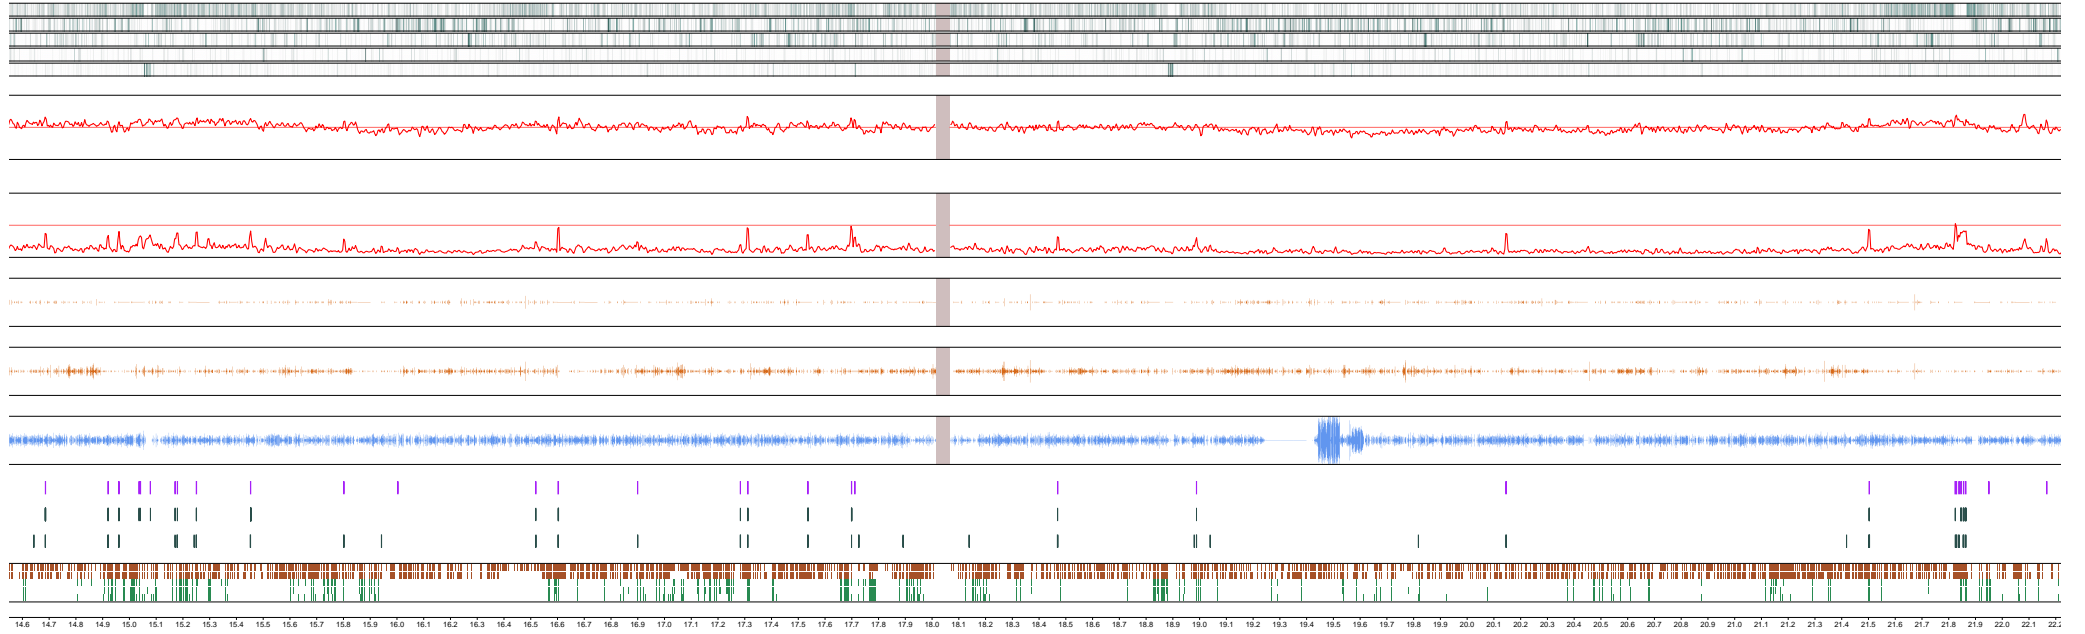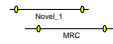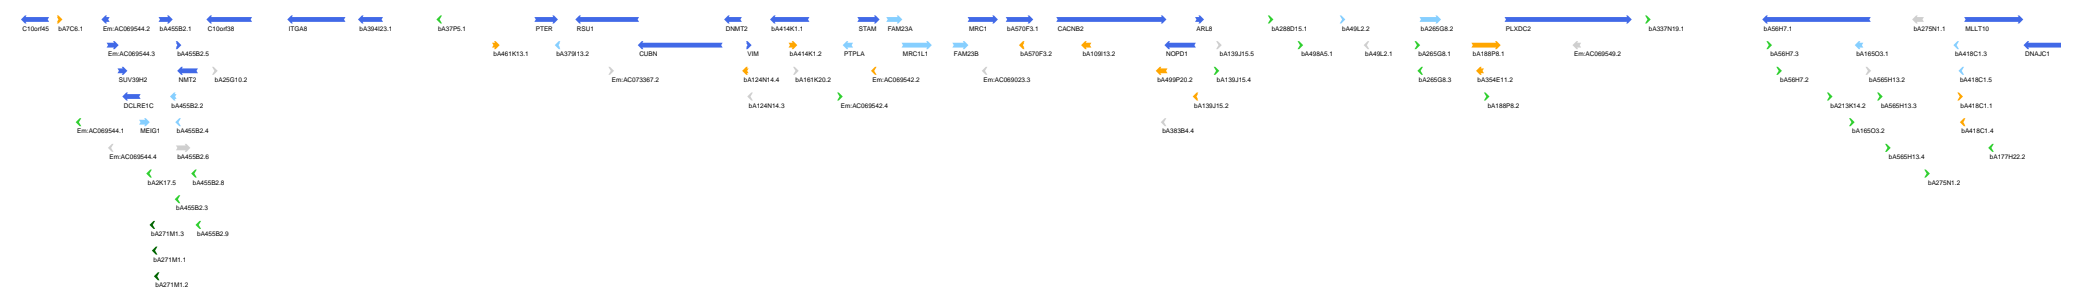

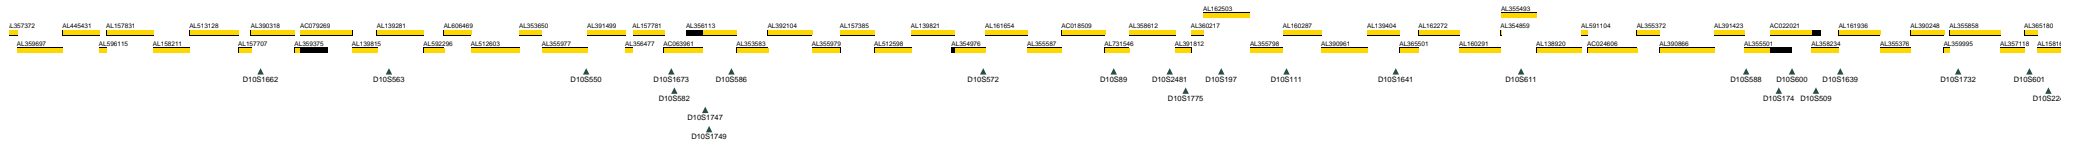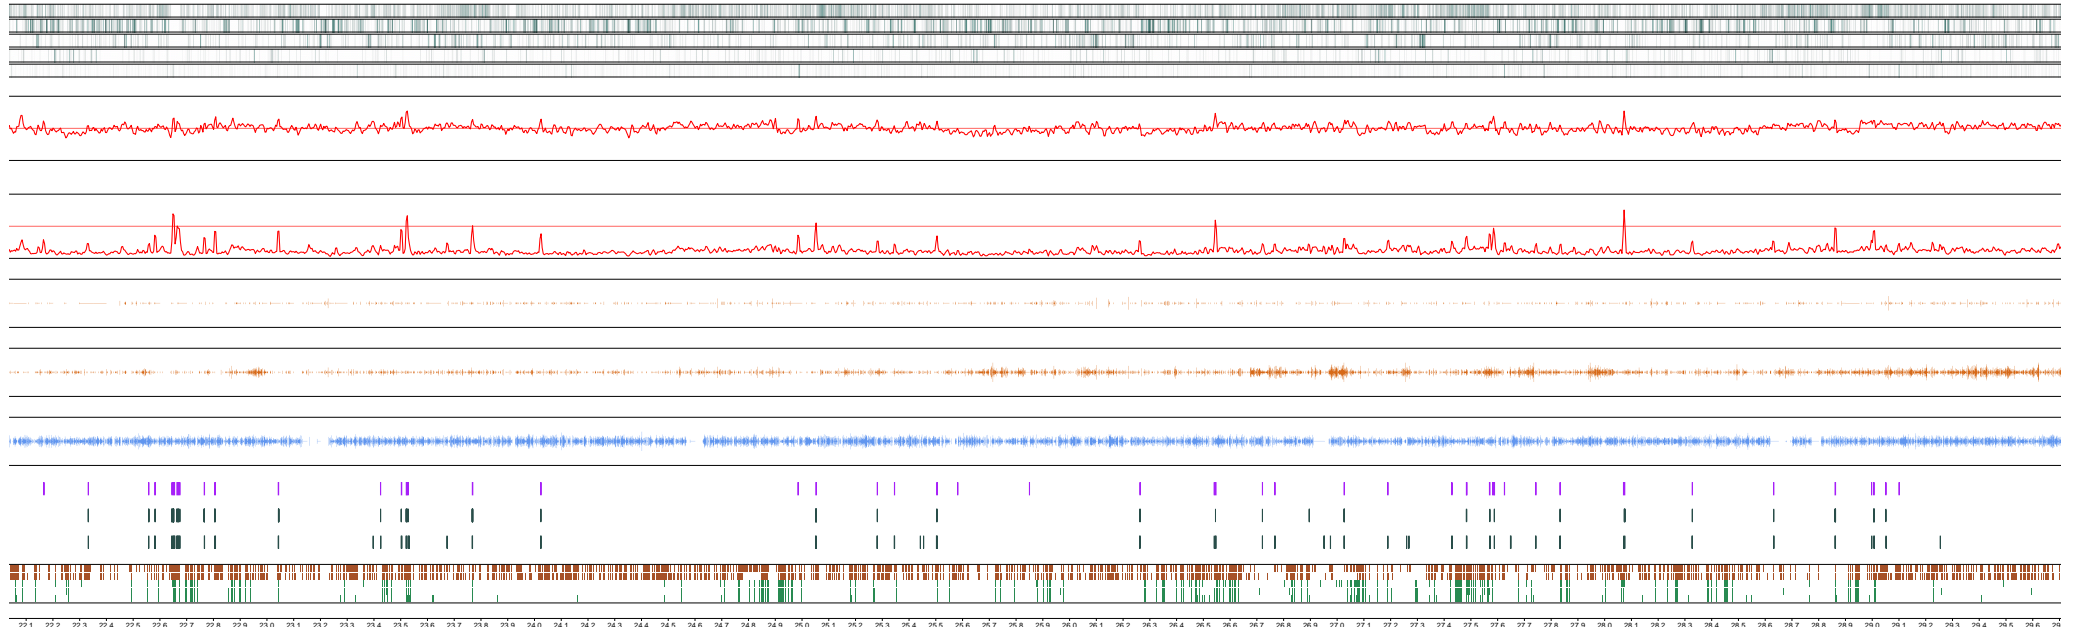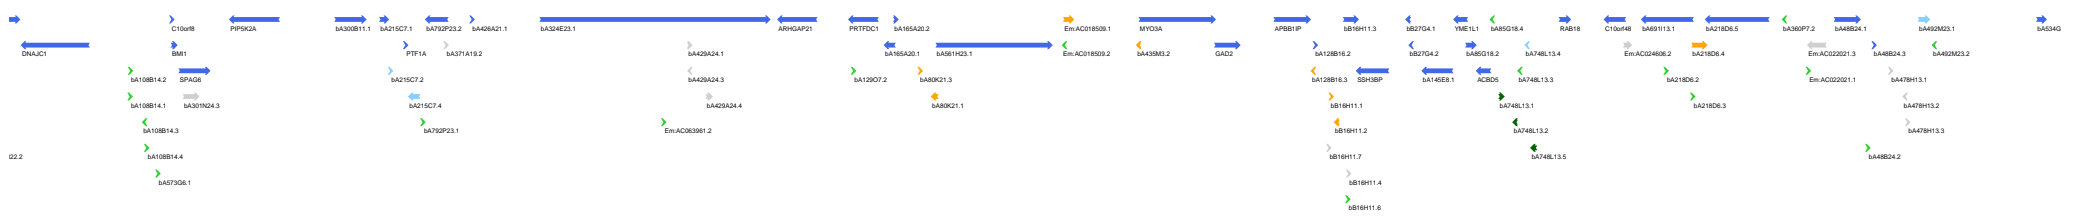

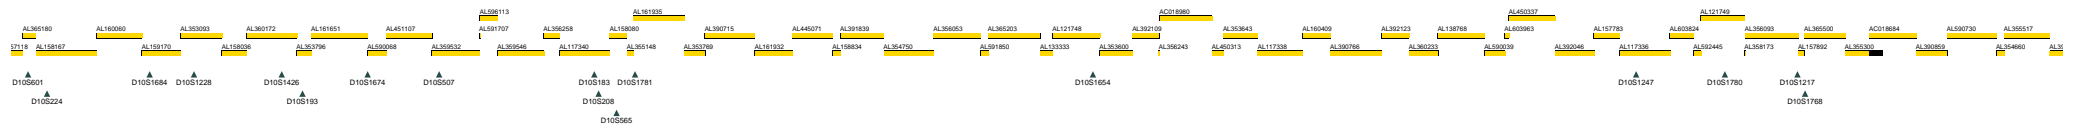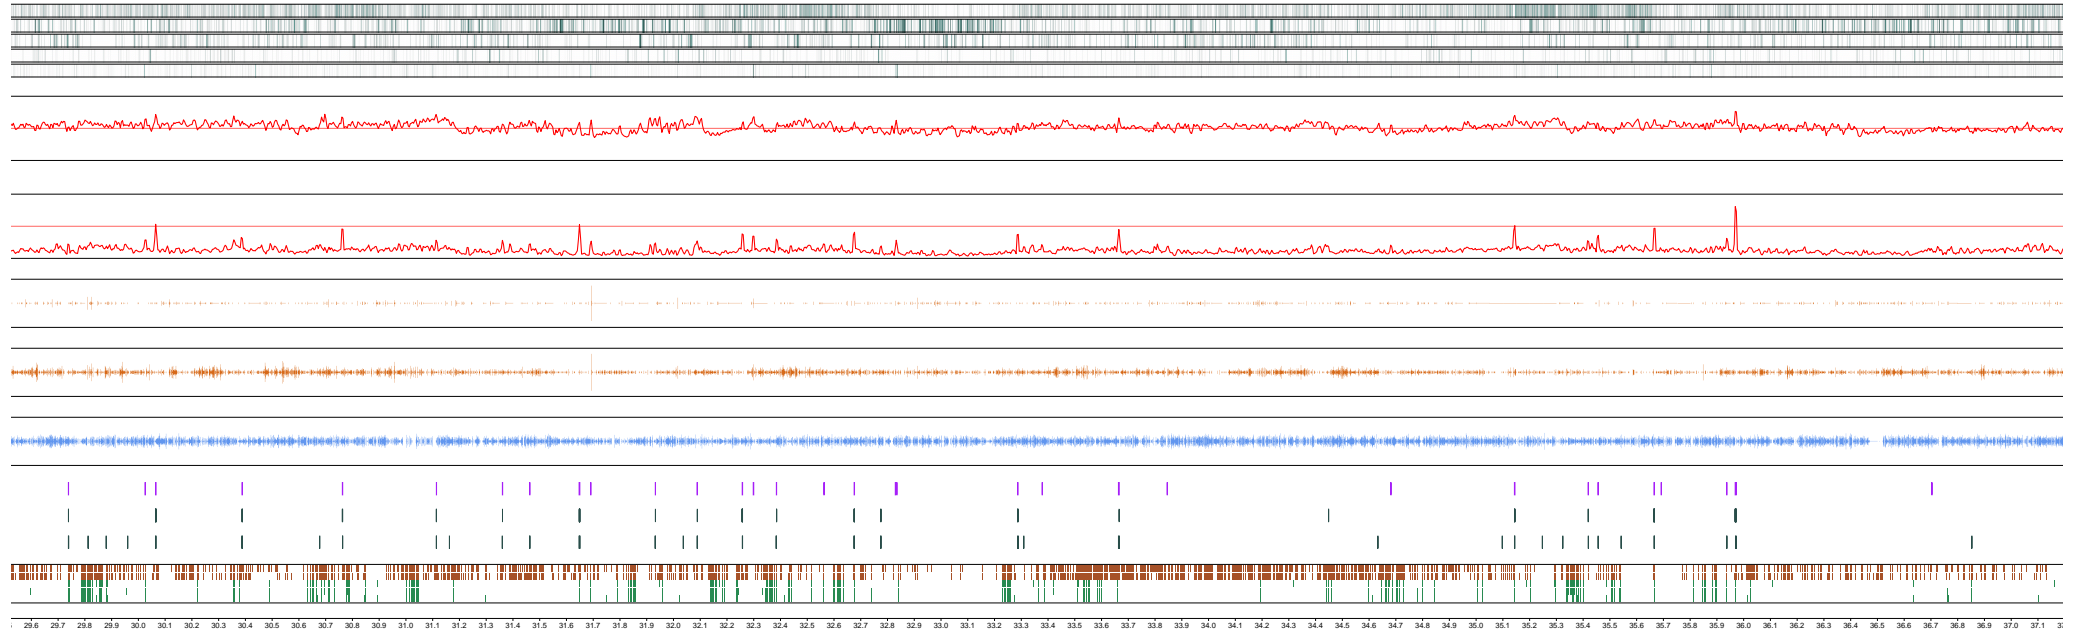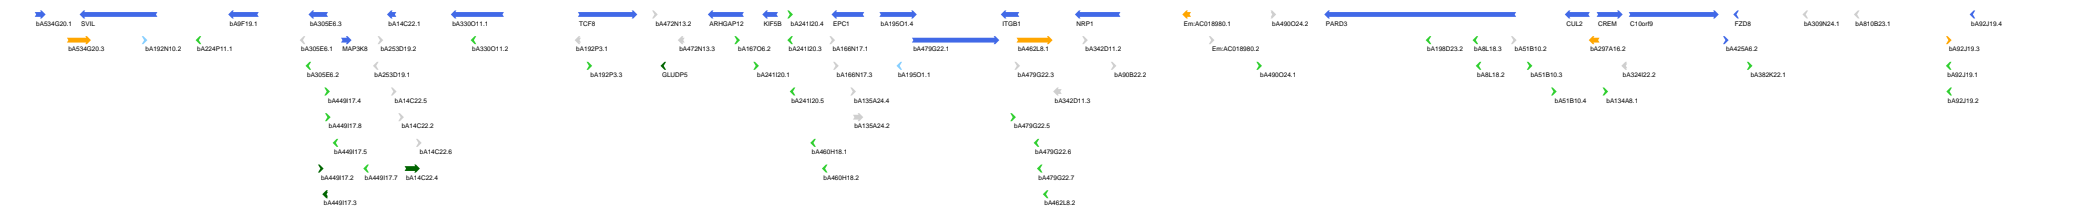

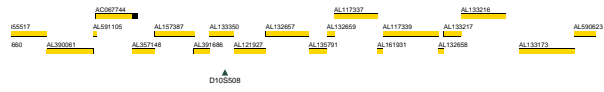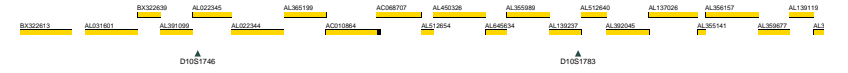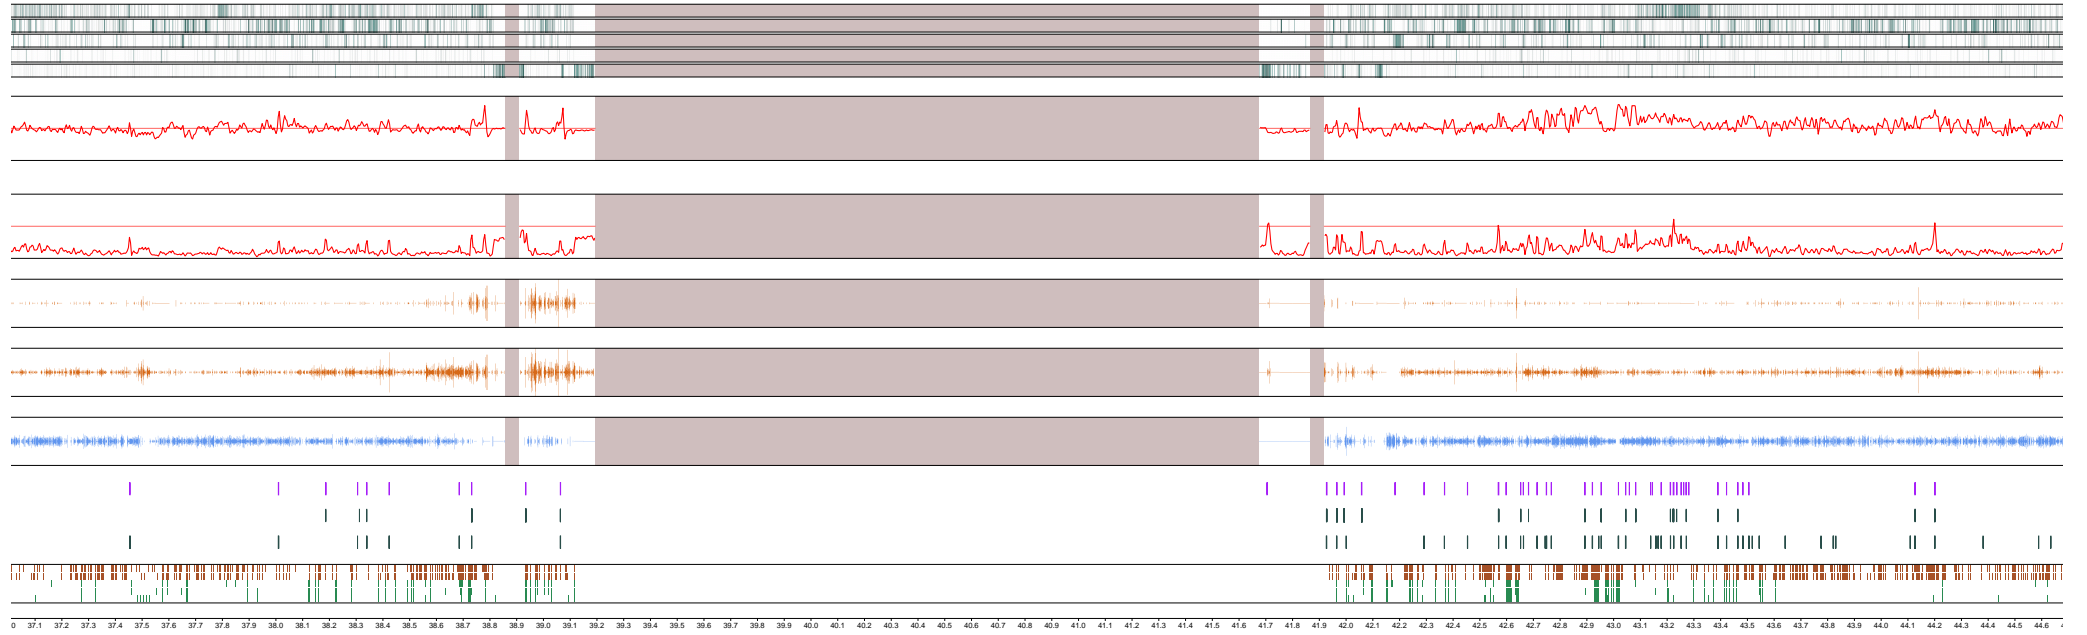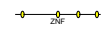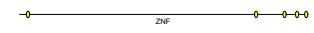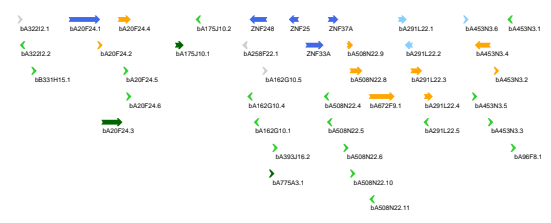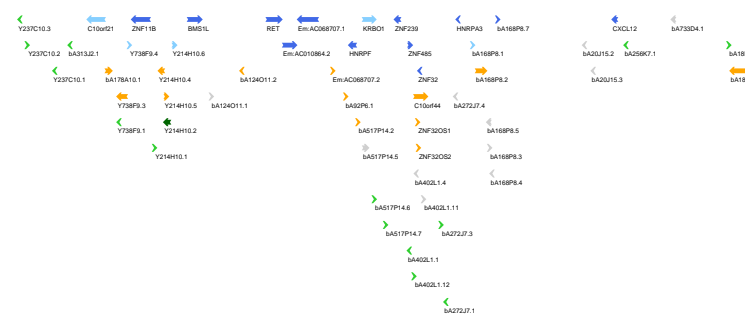

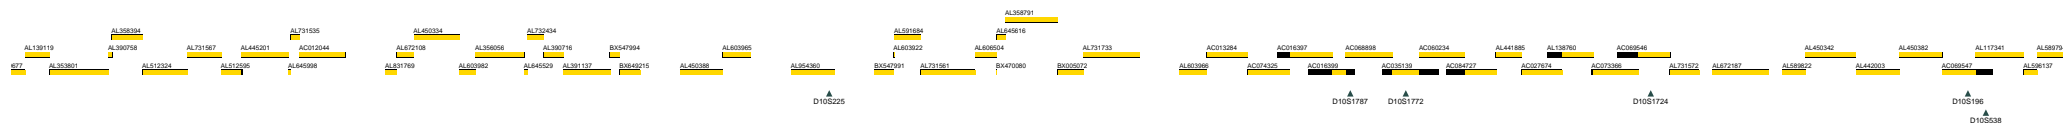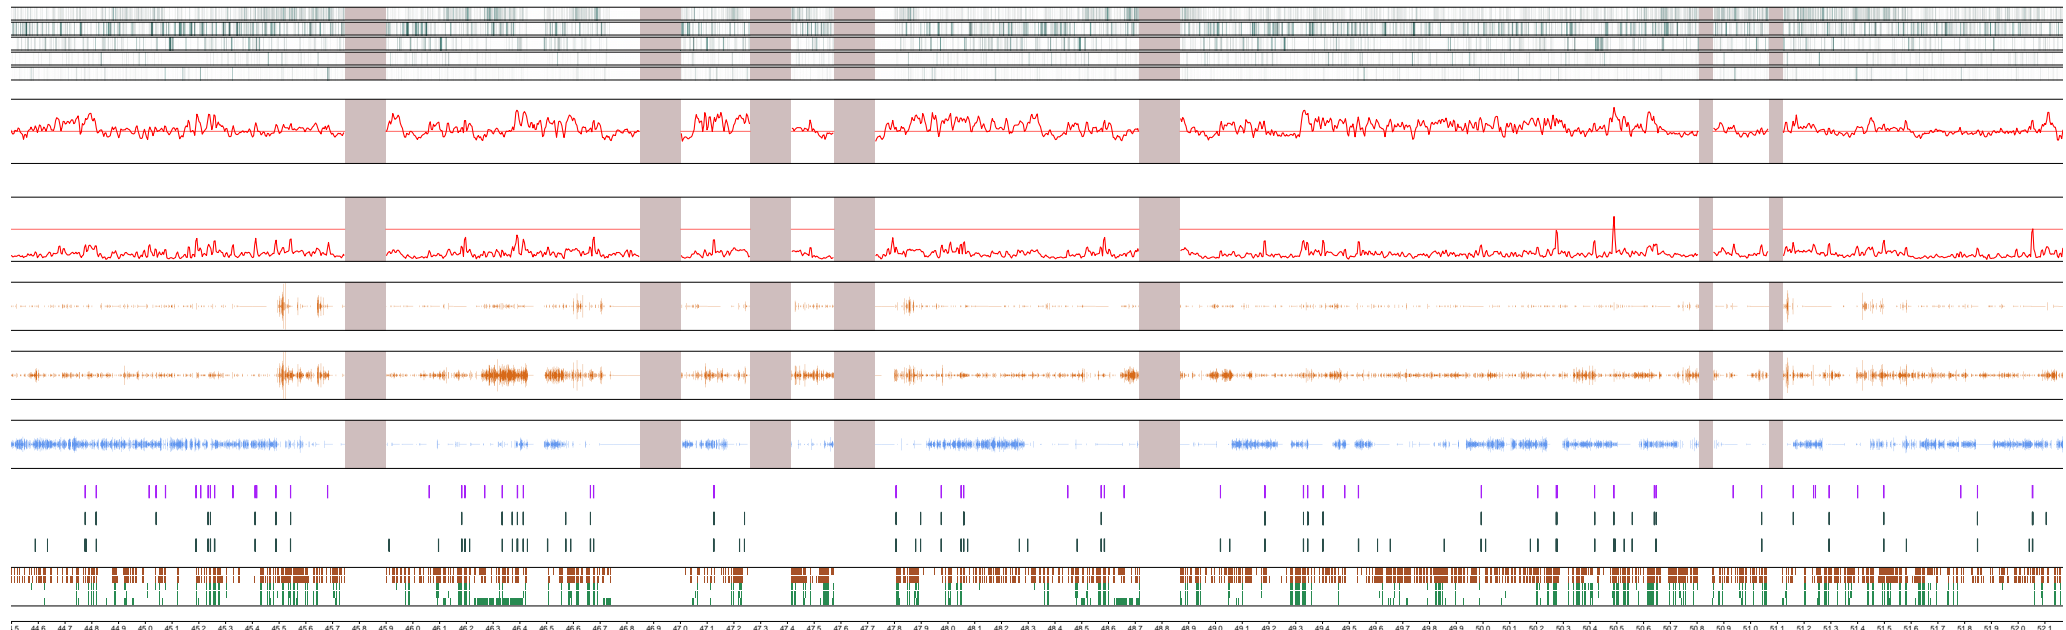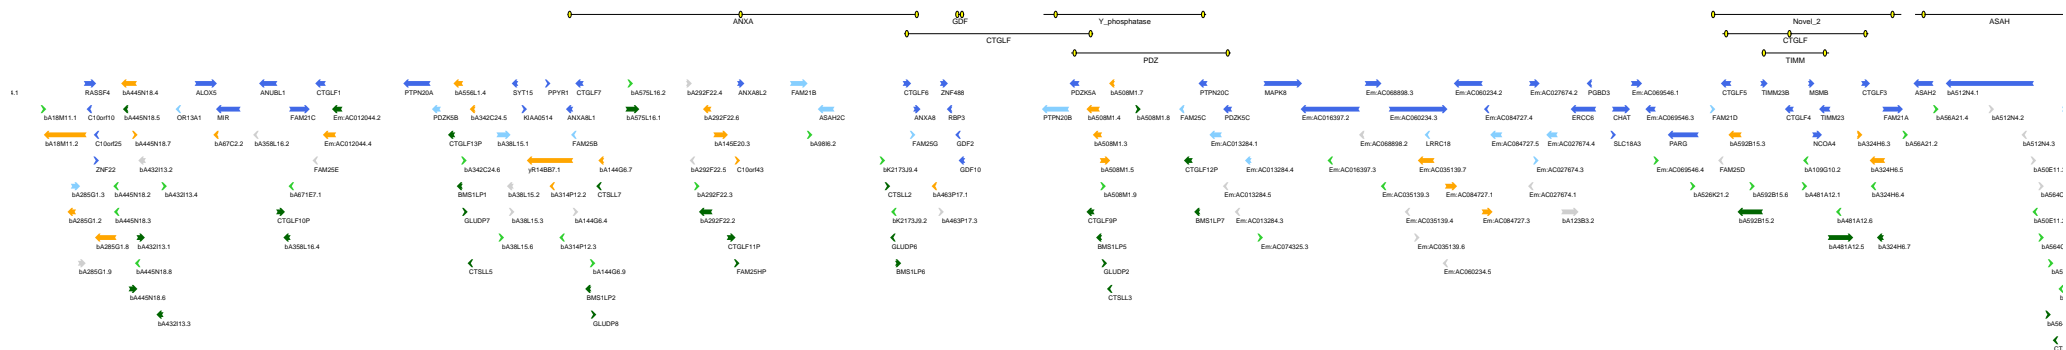

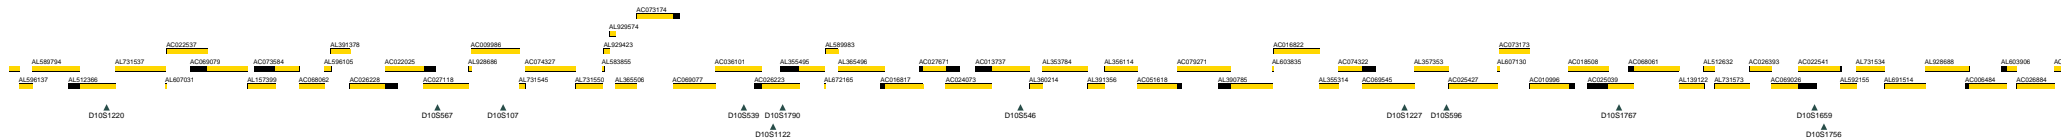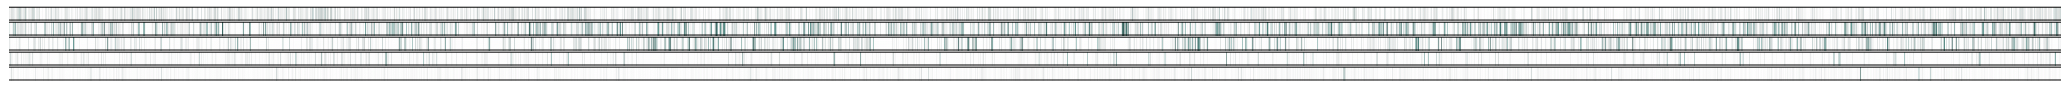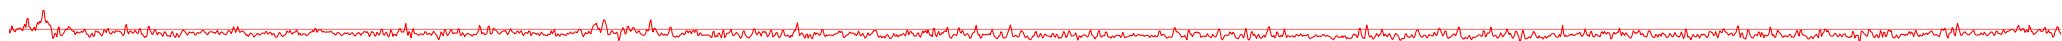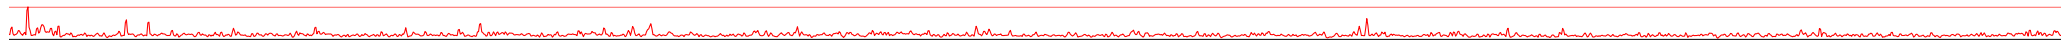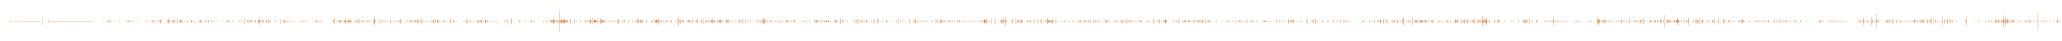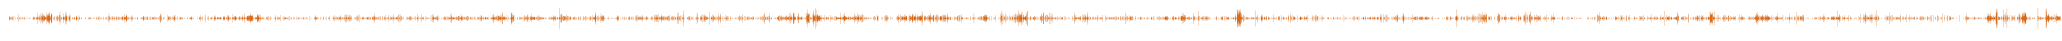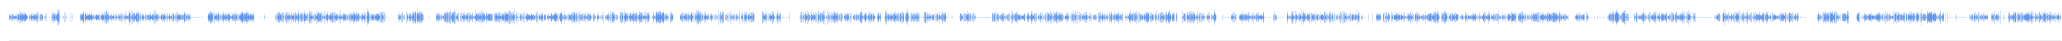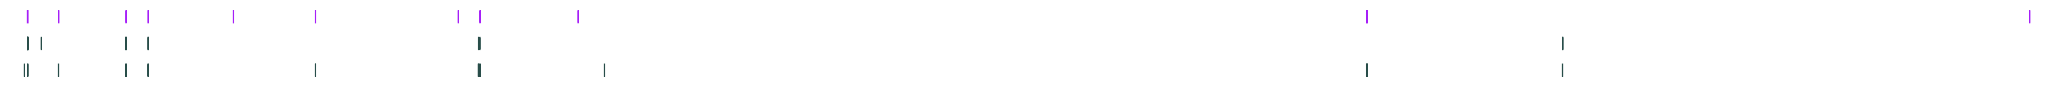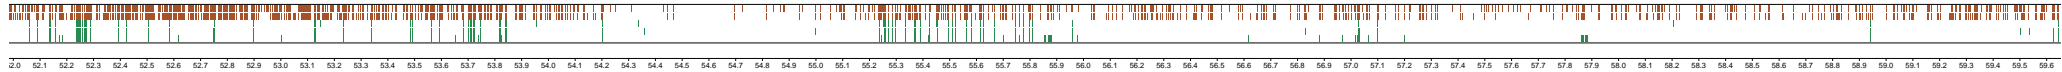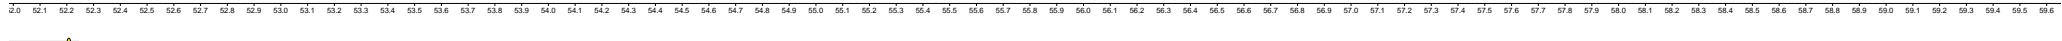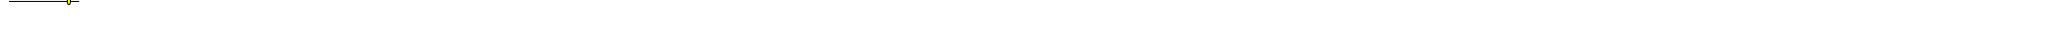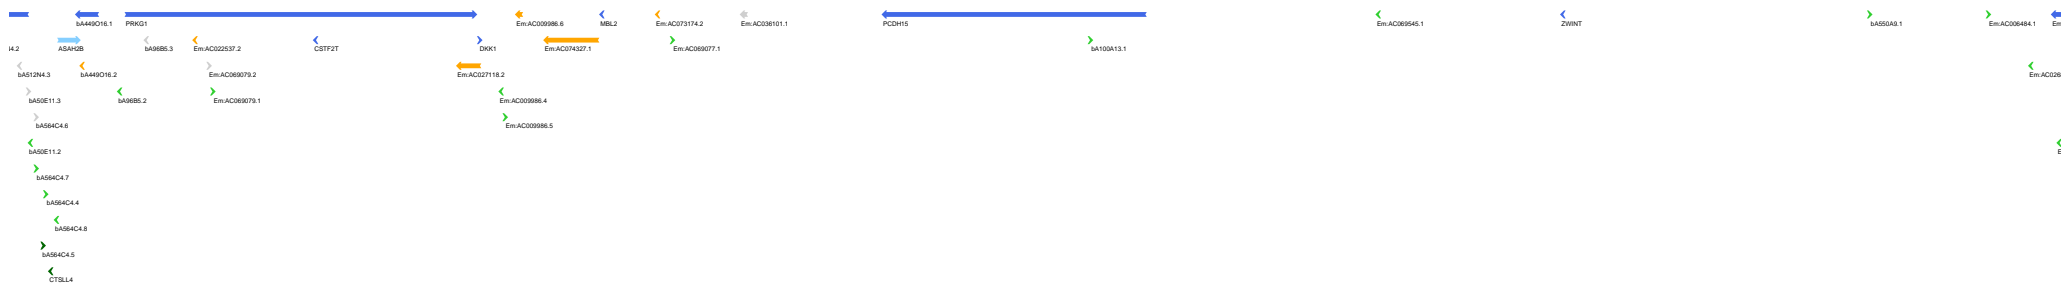



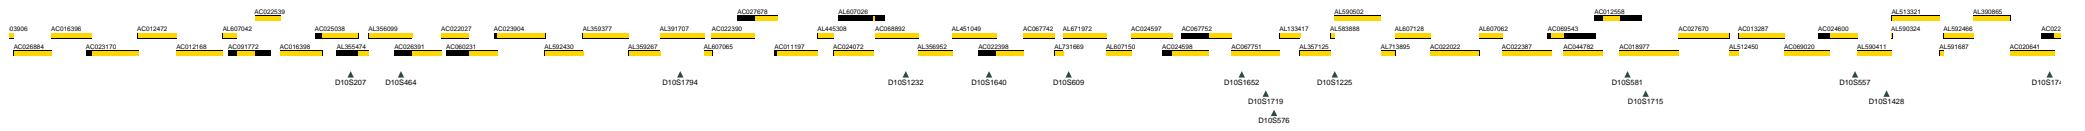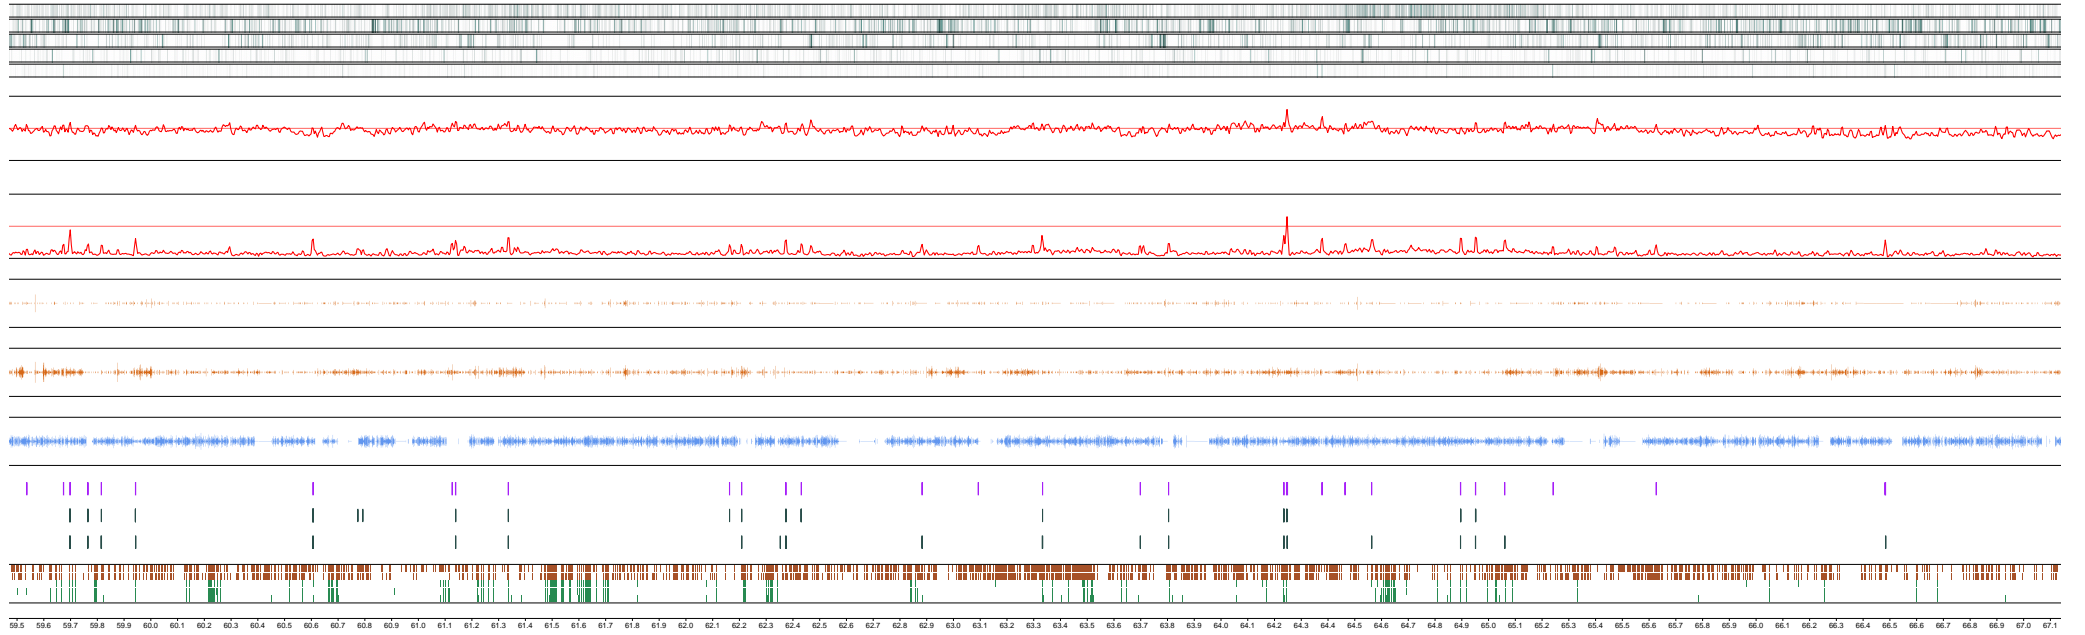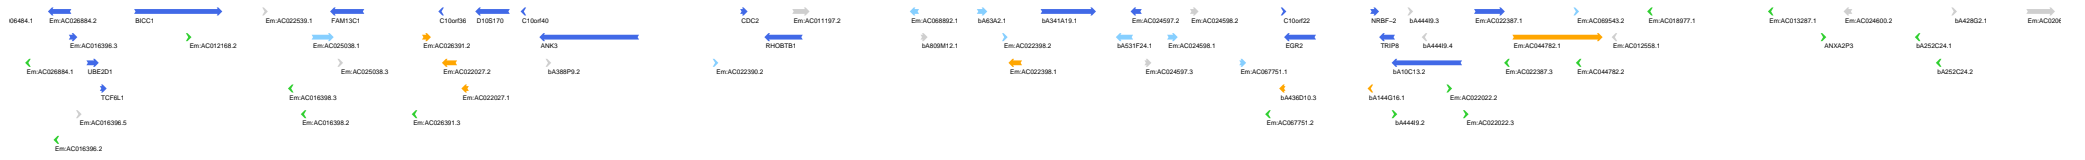

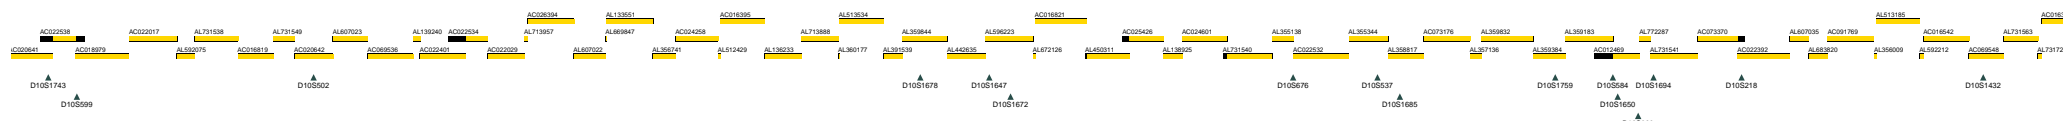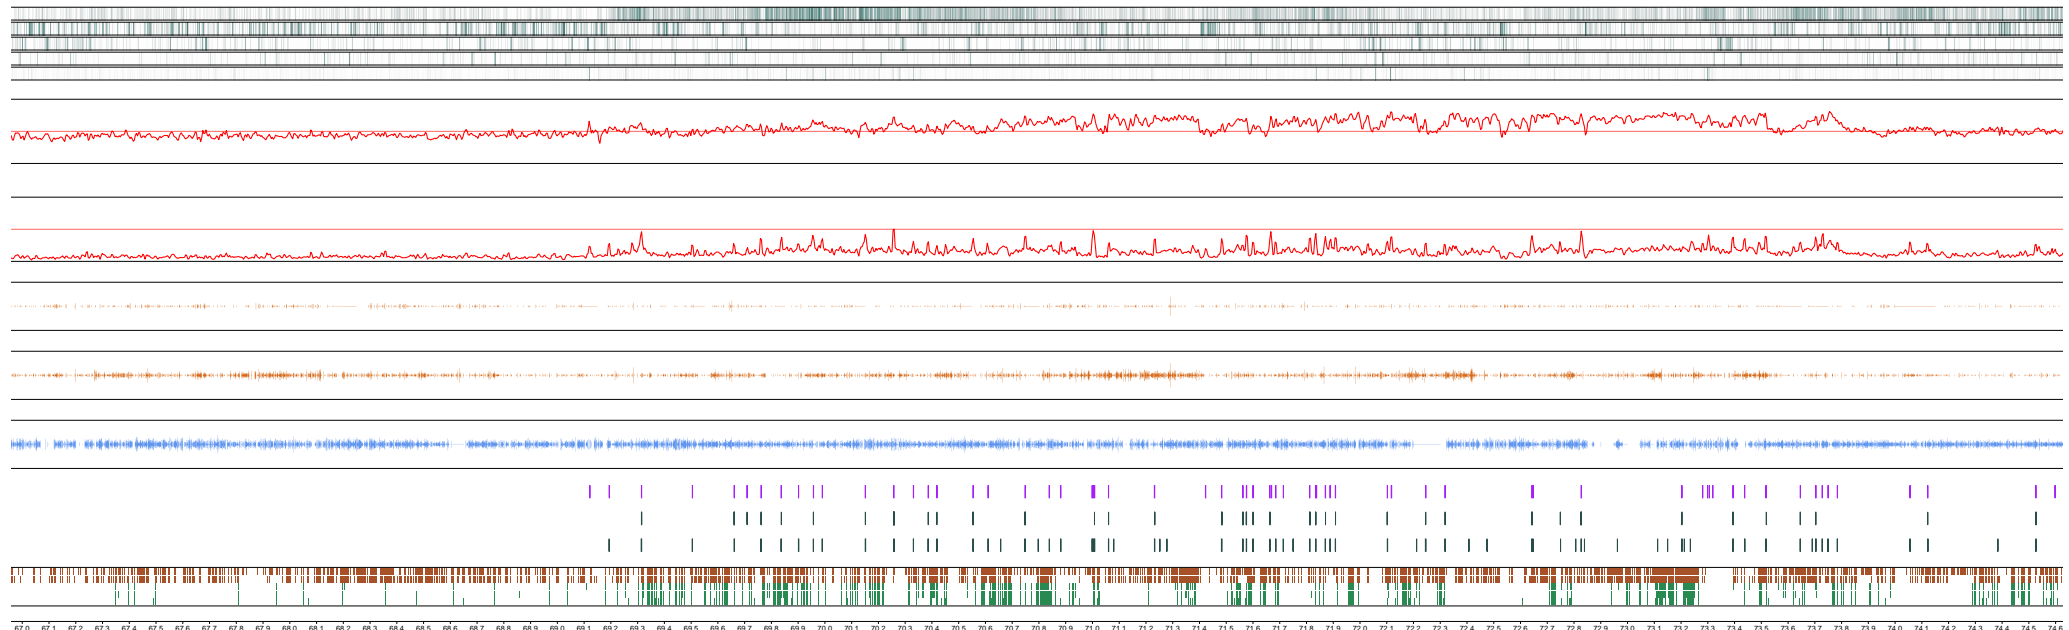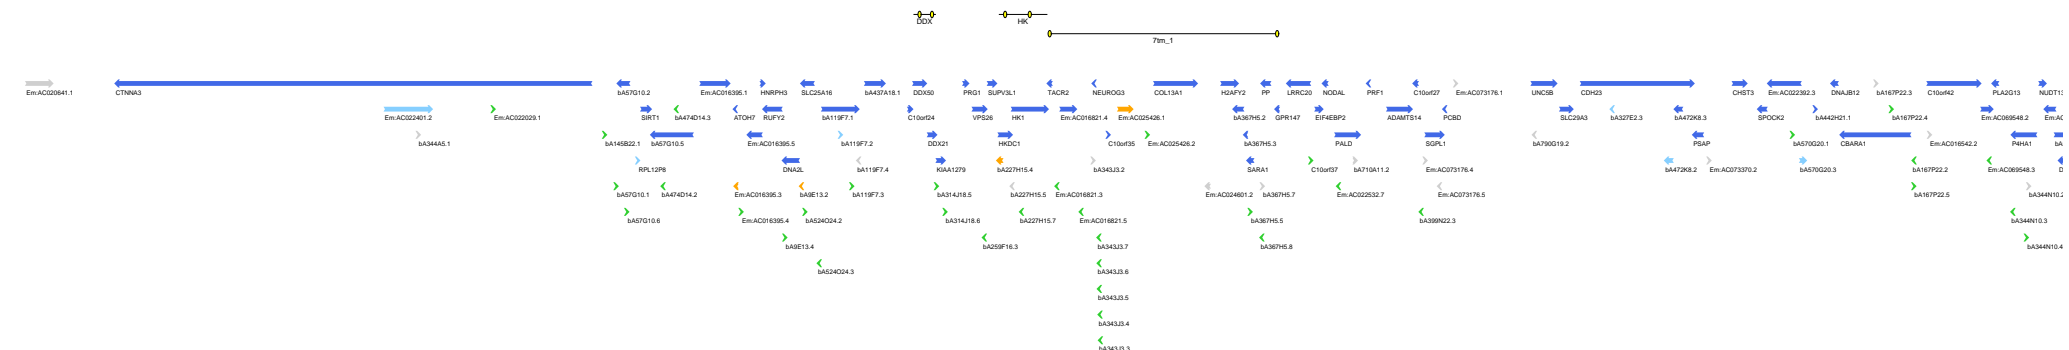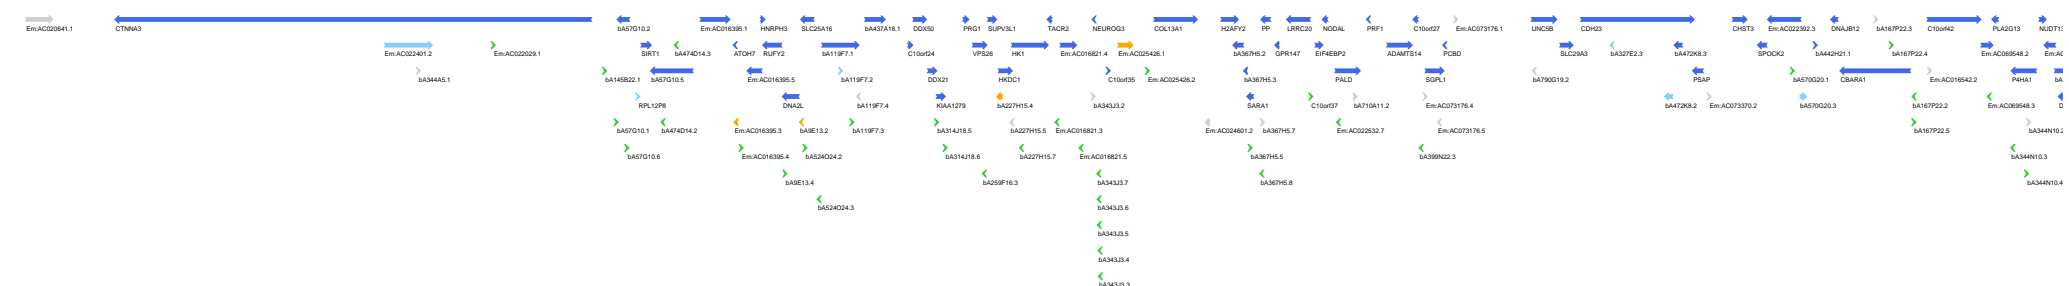

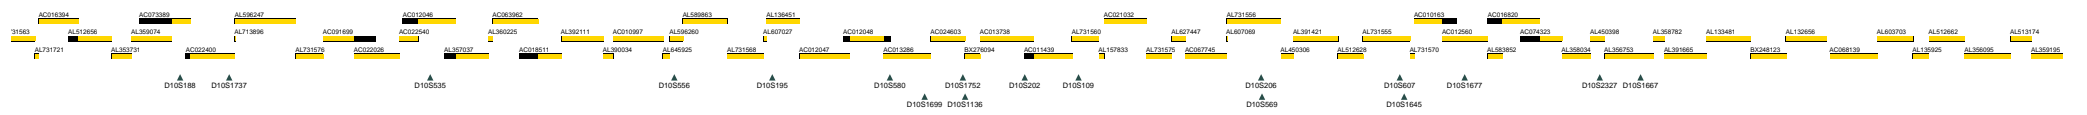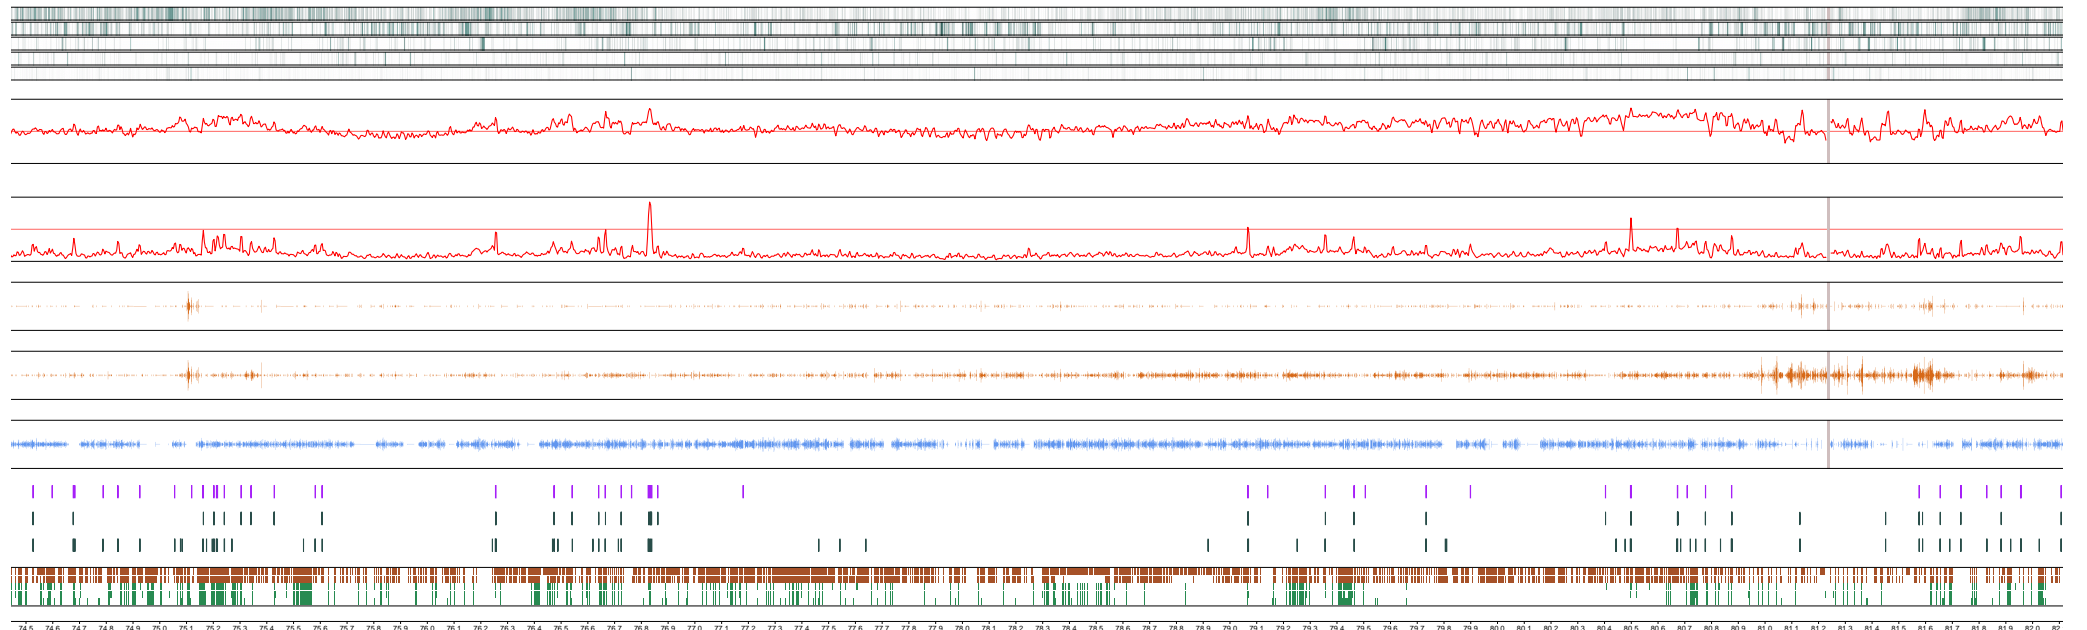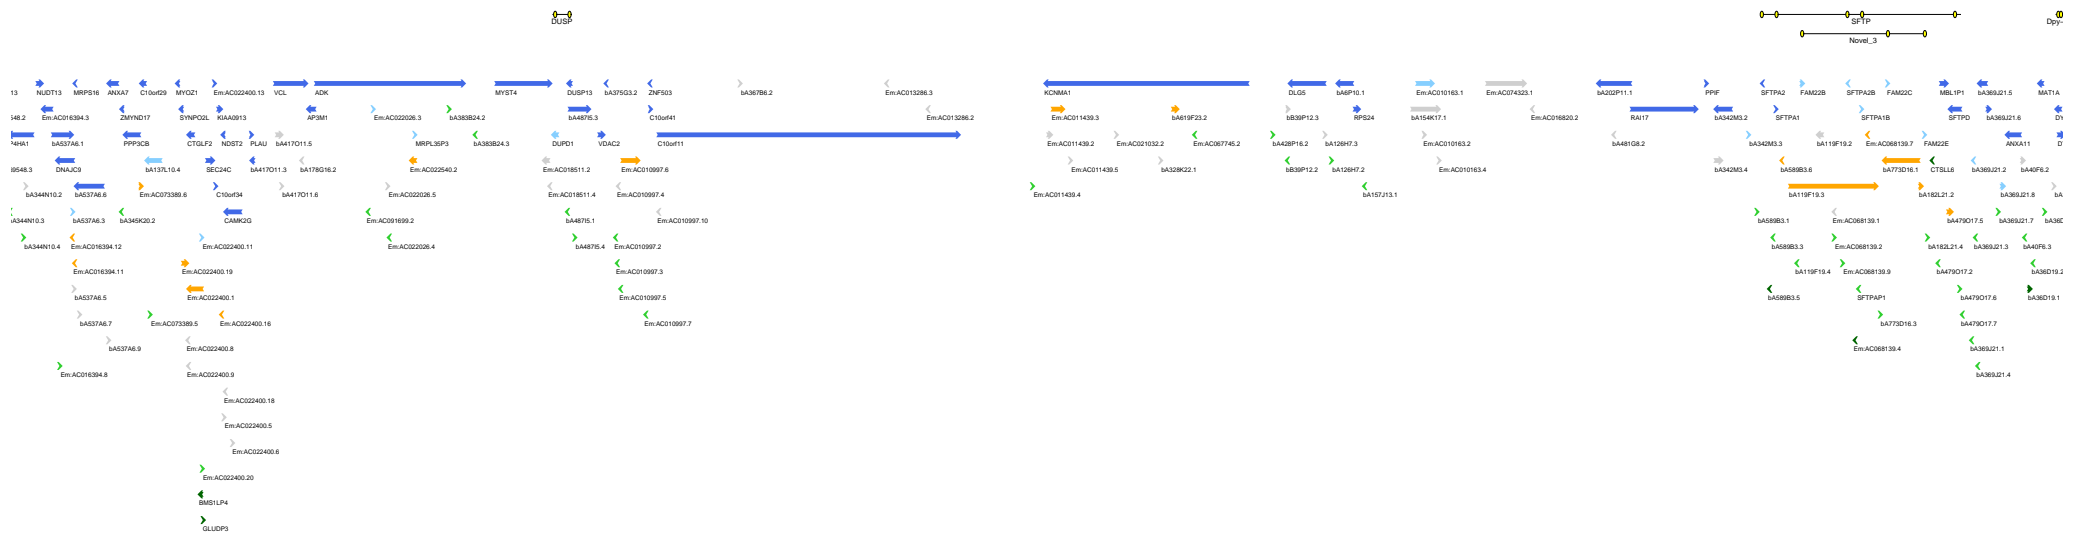

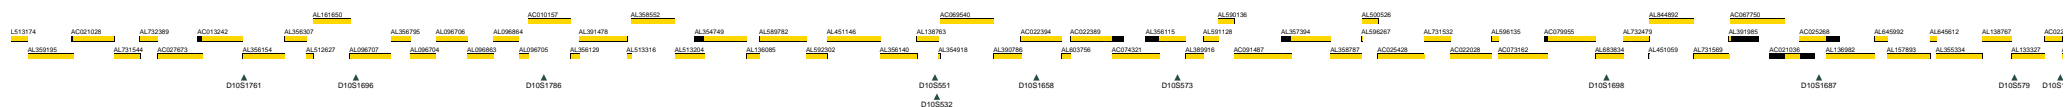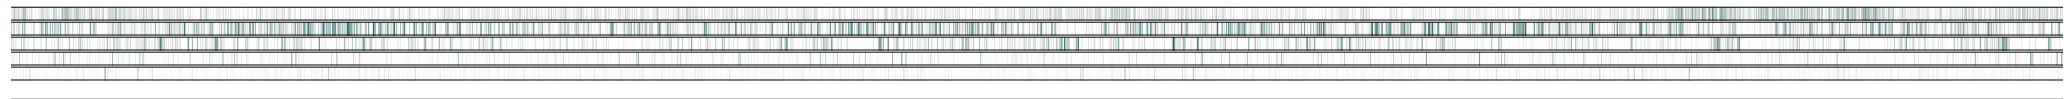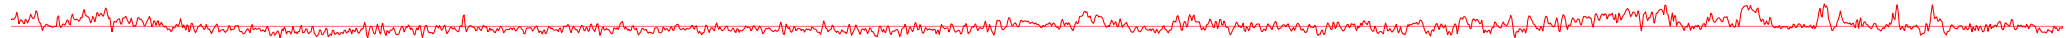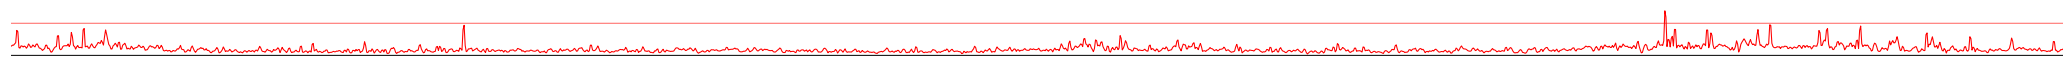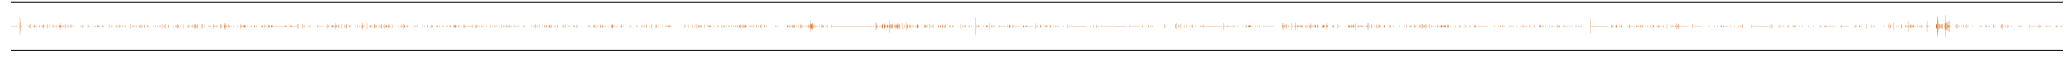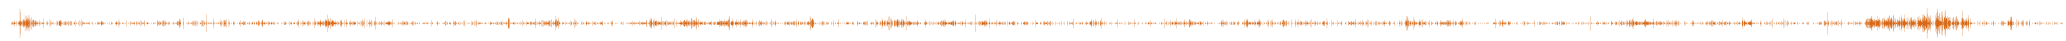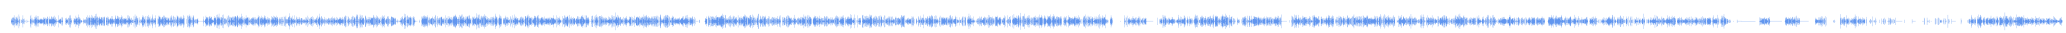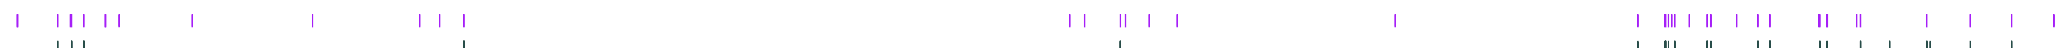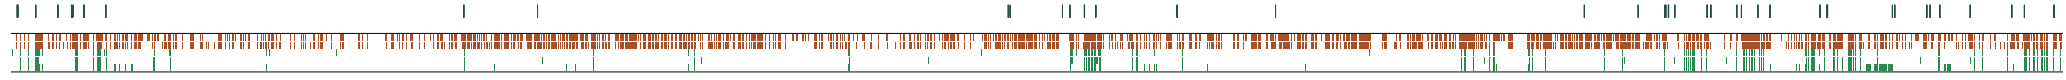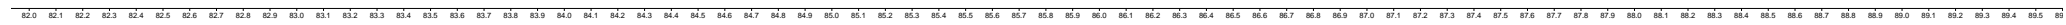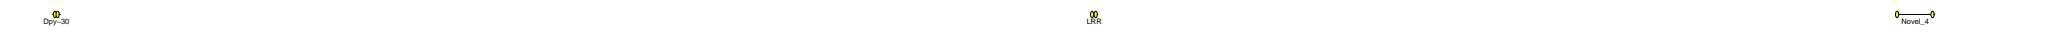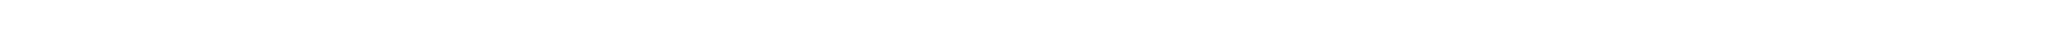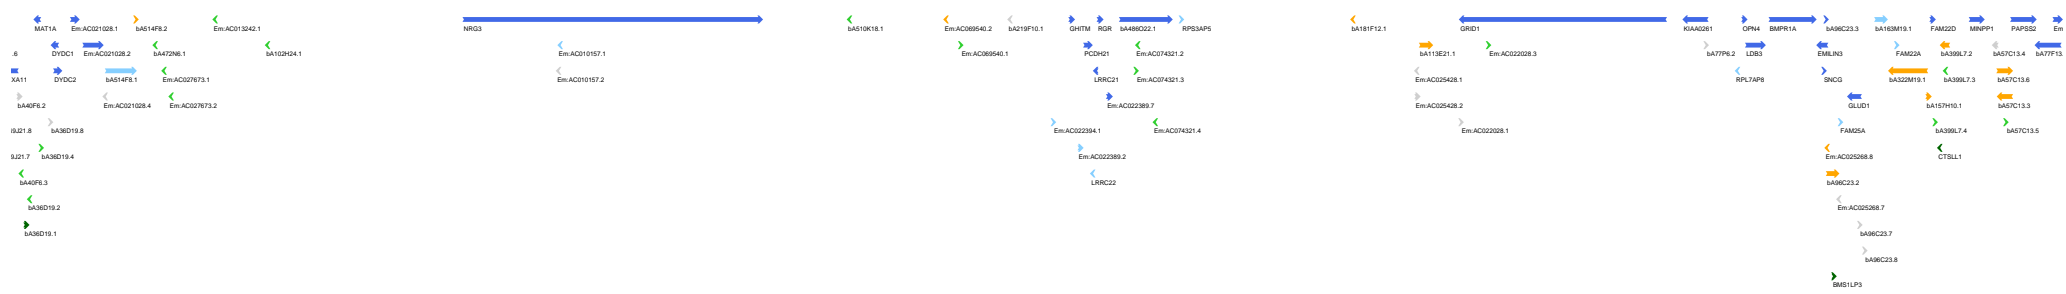

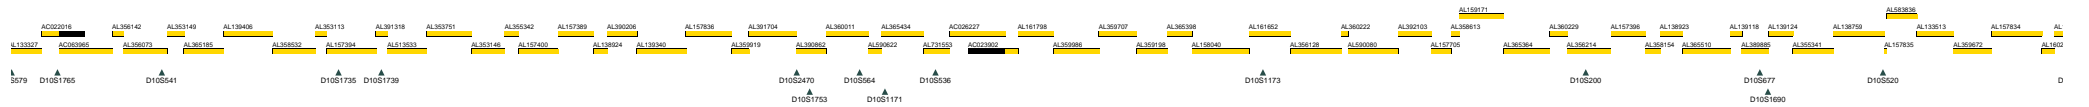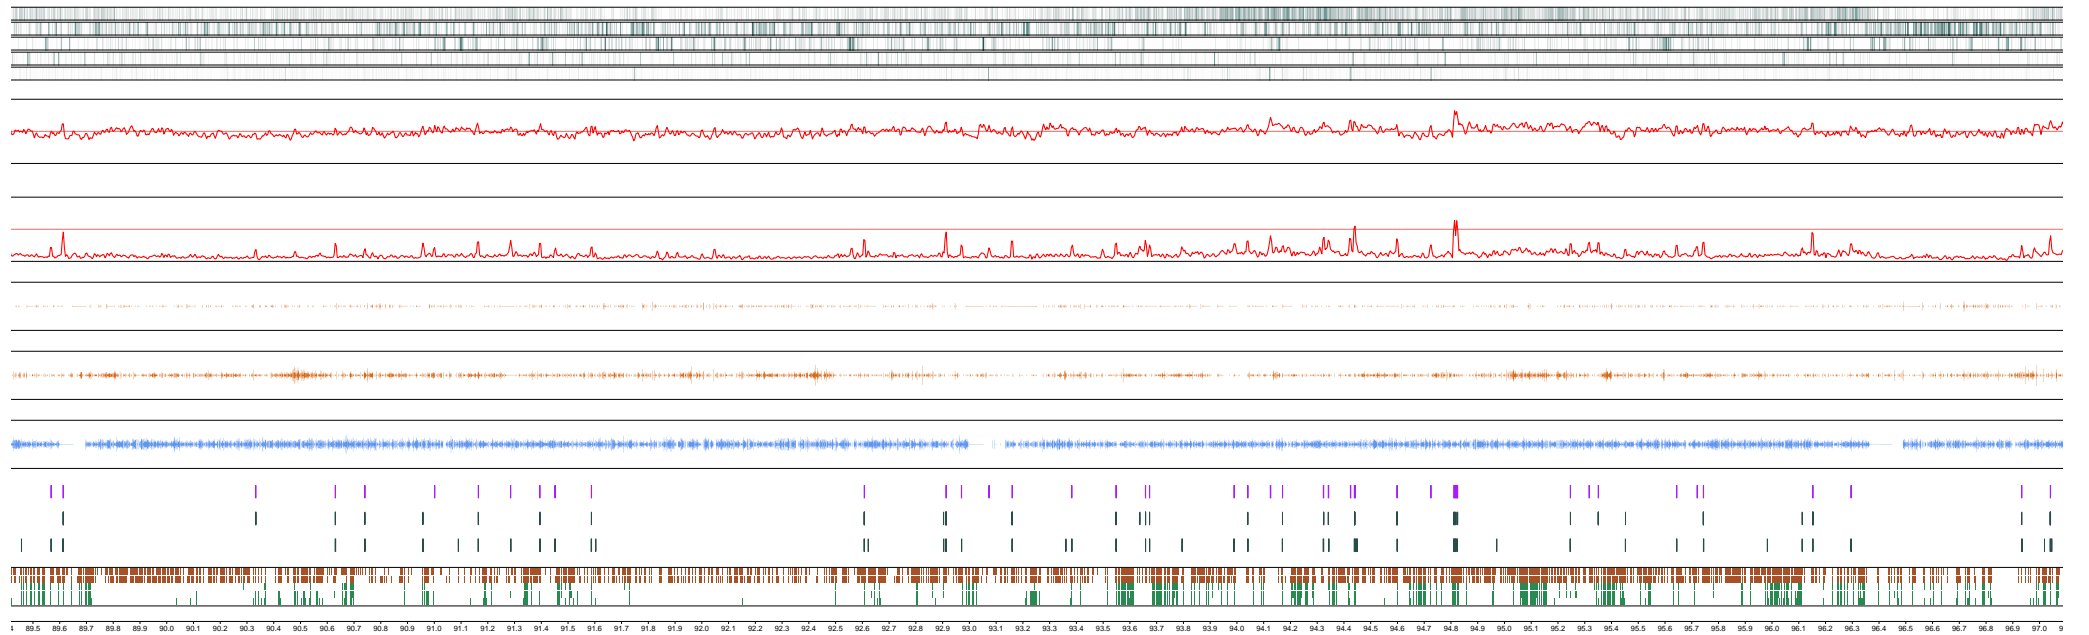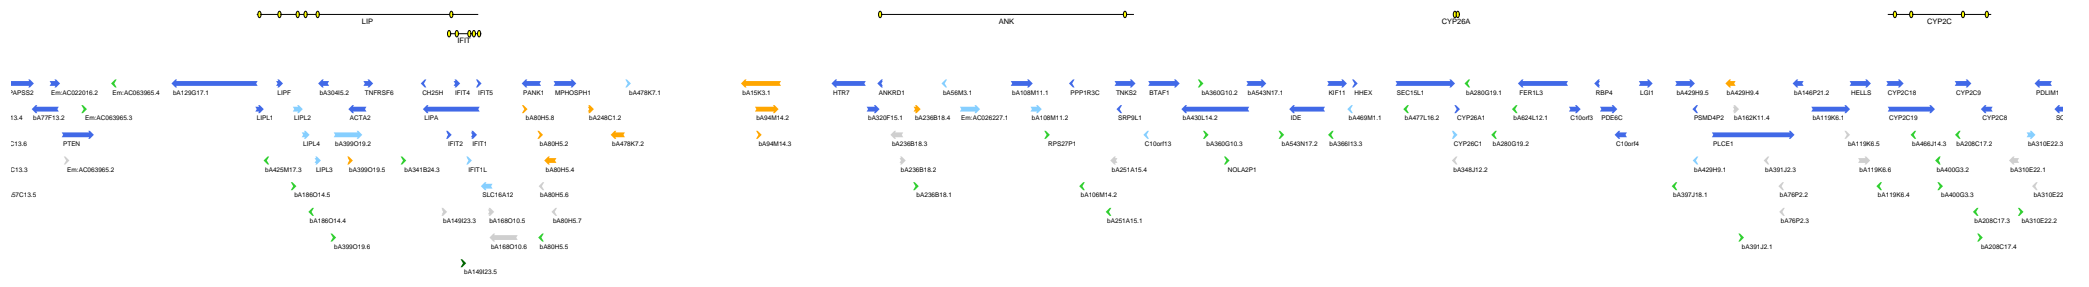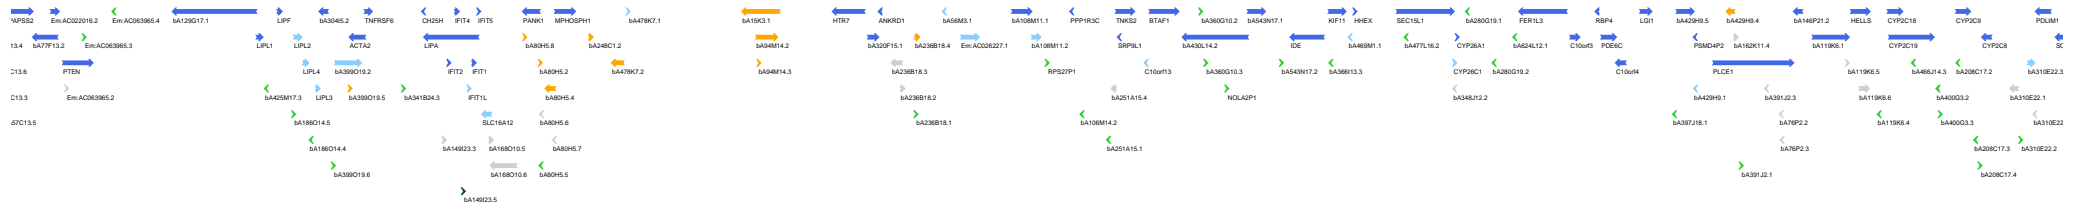



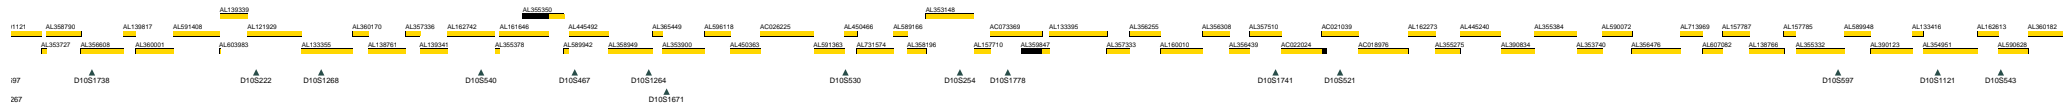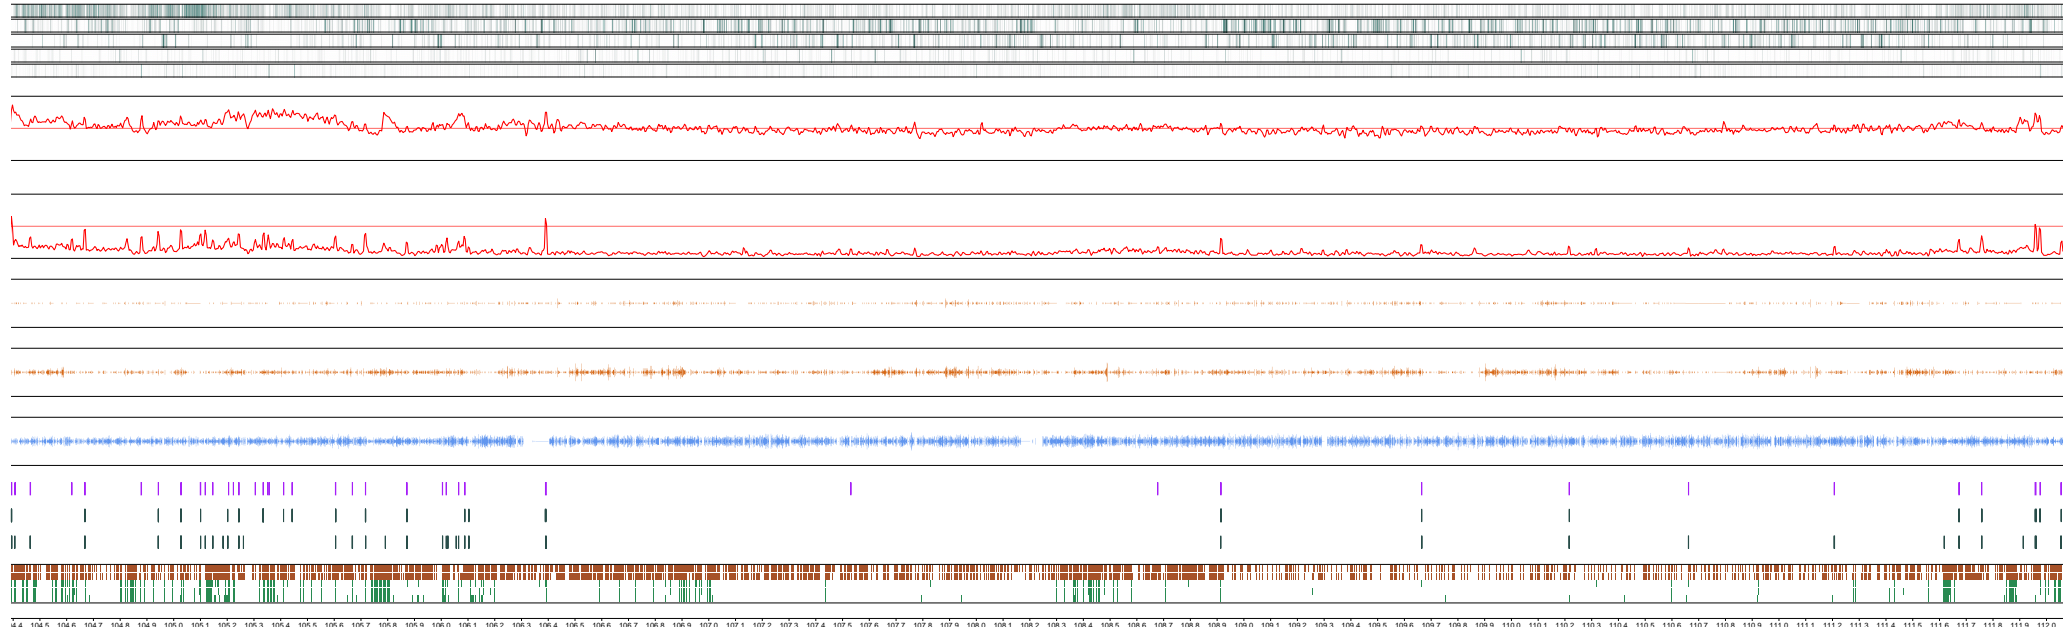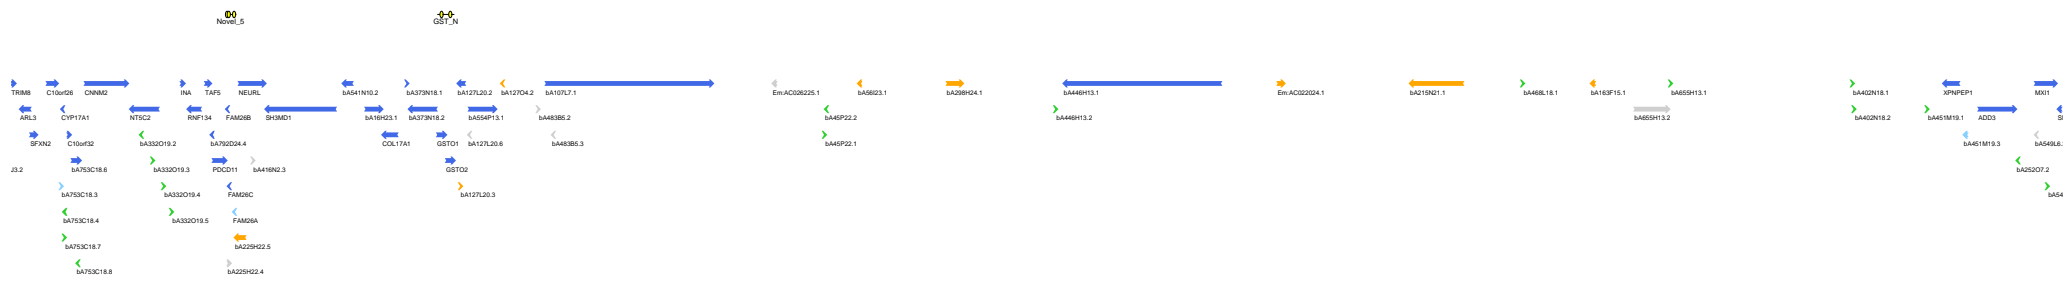

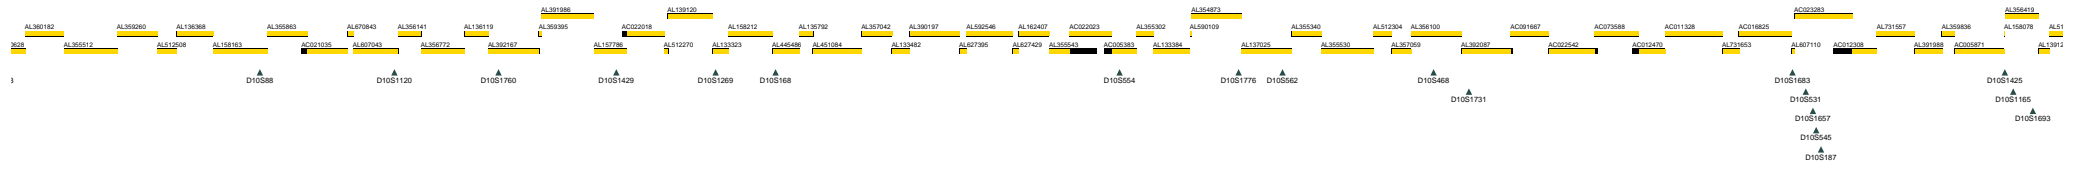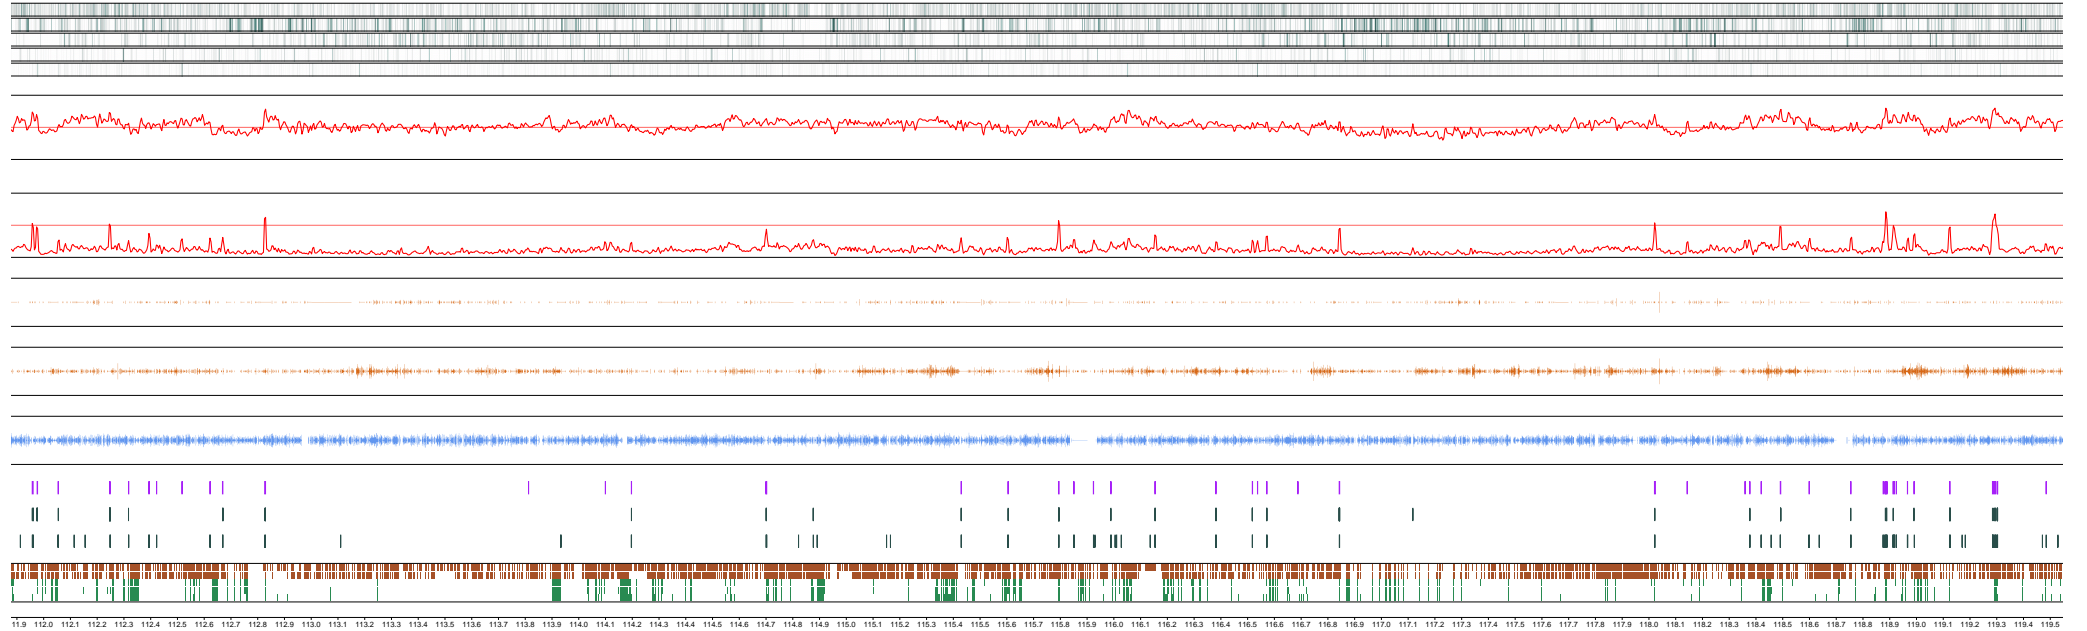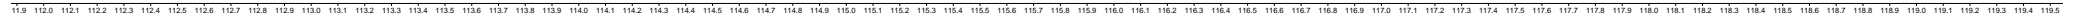

PNLS

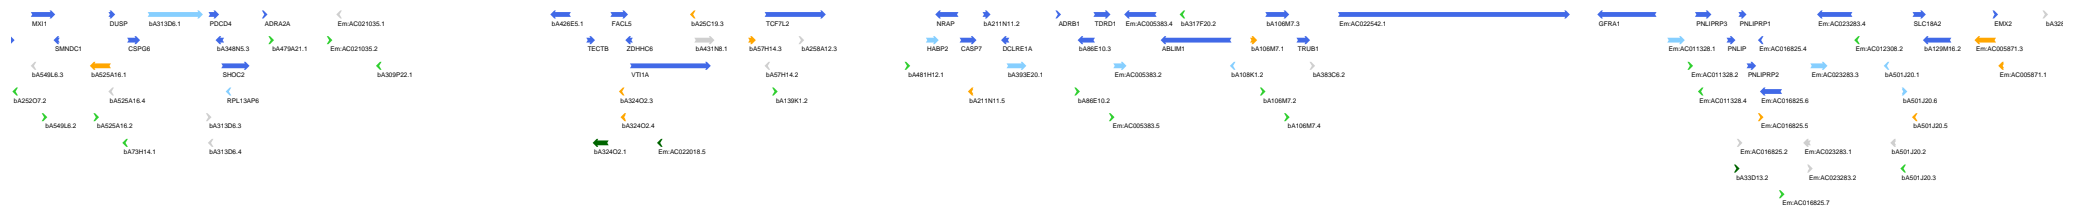



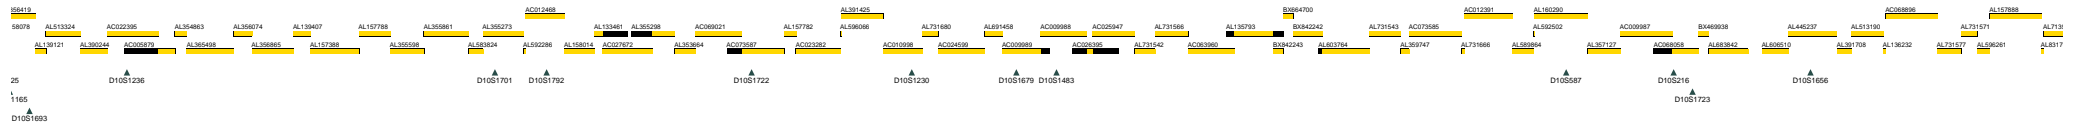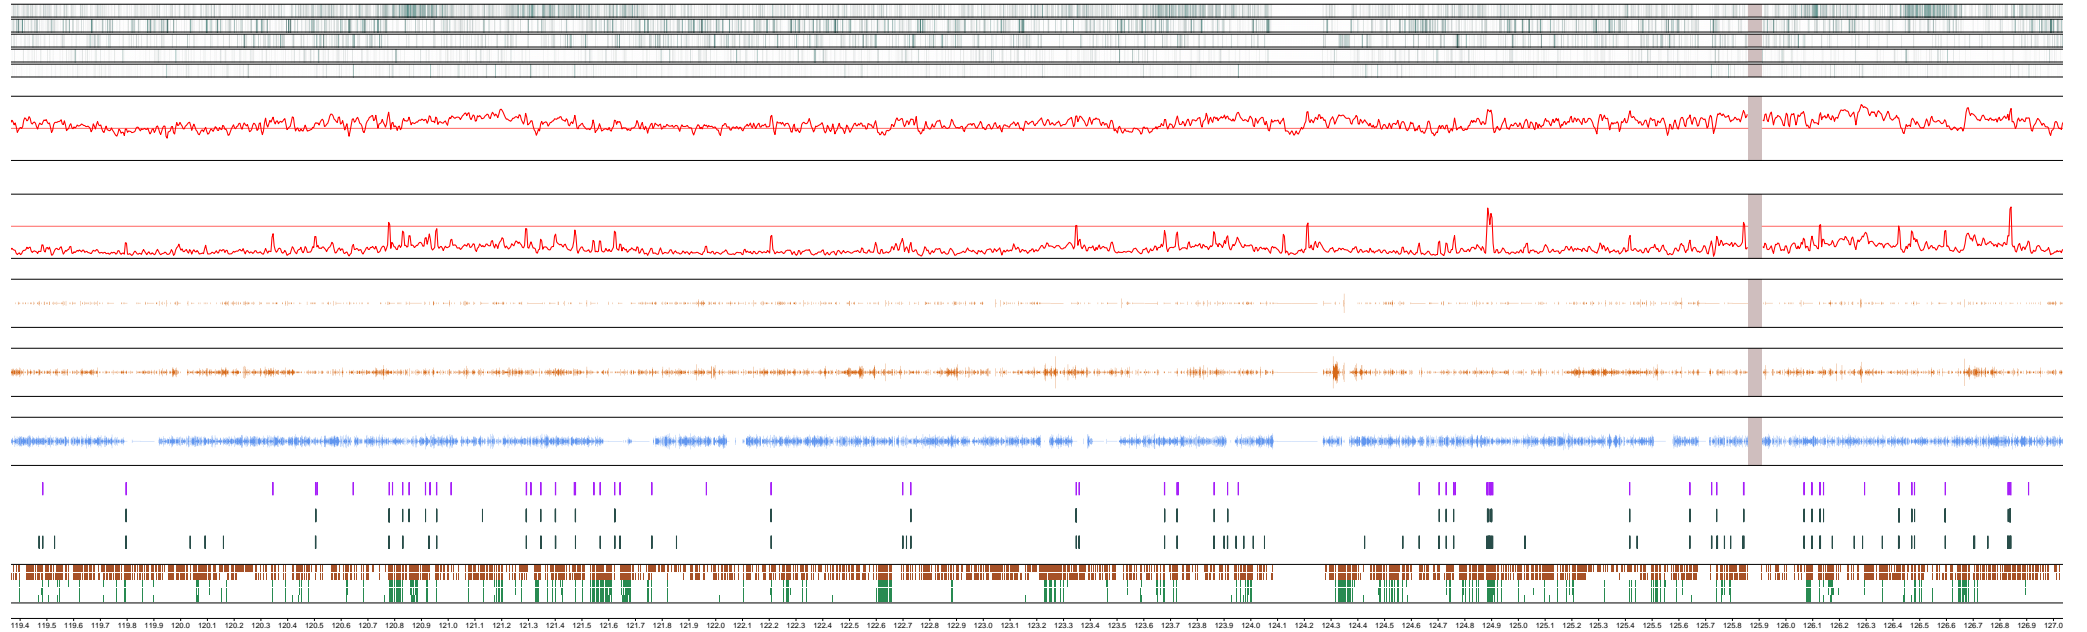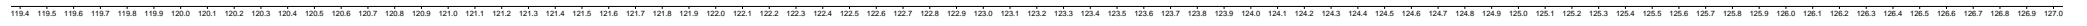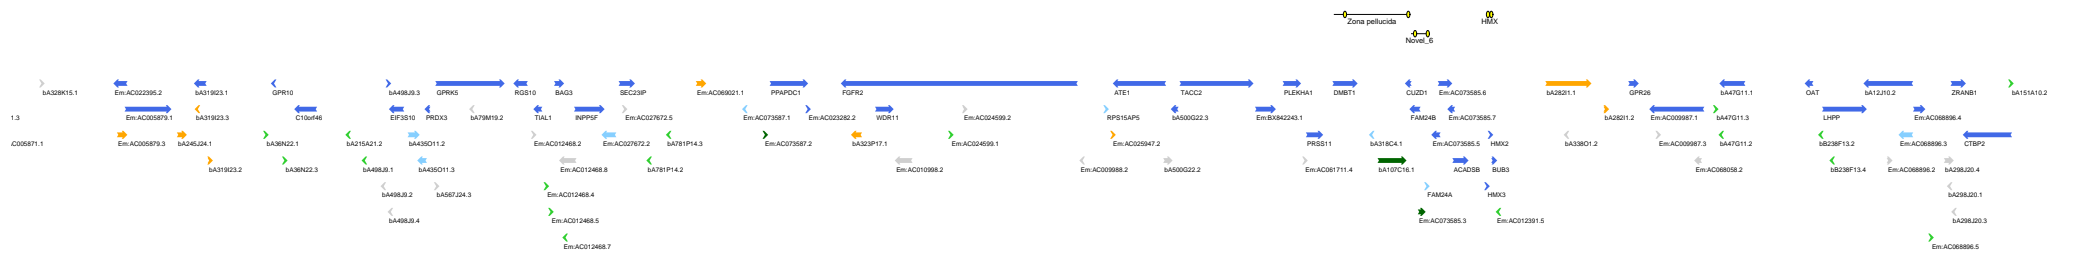

Zona pellucida  
HXX  
Novel\_0

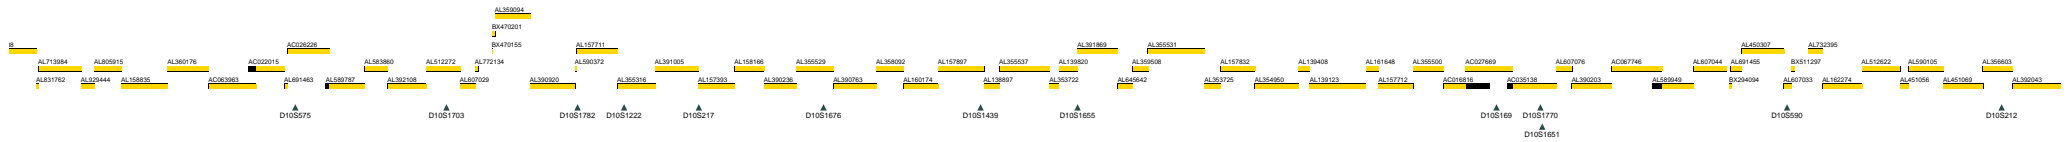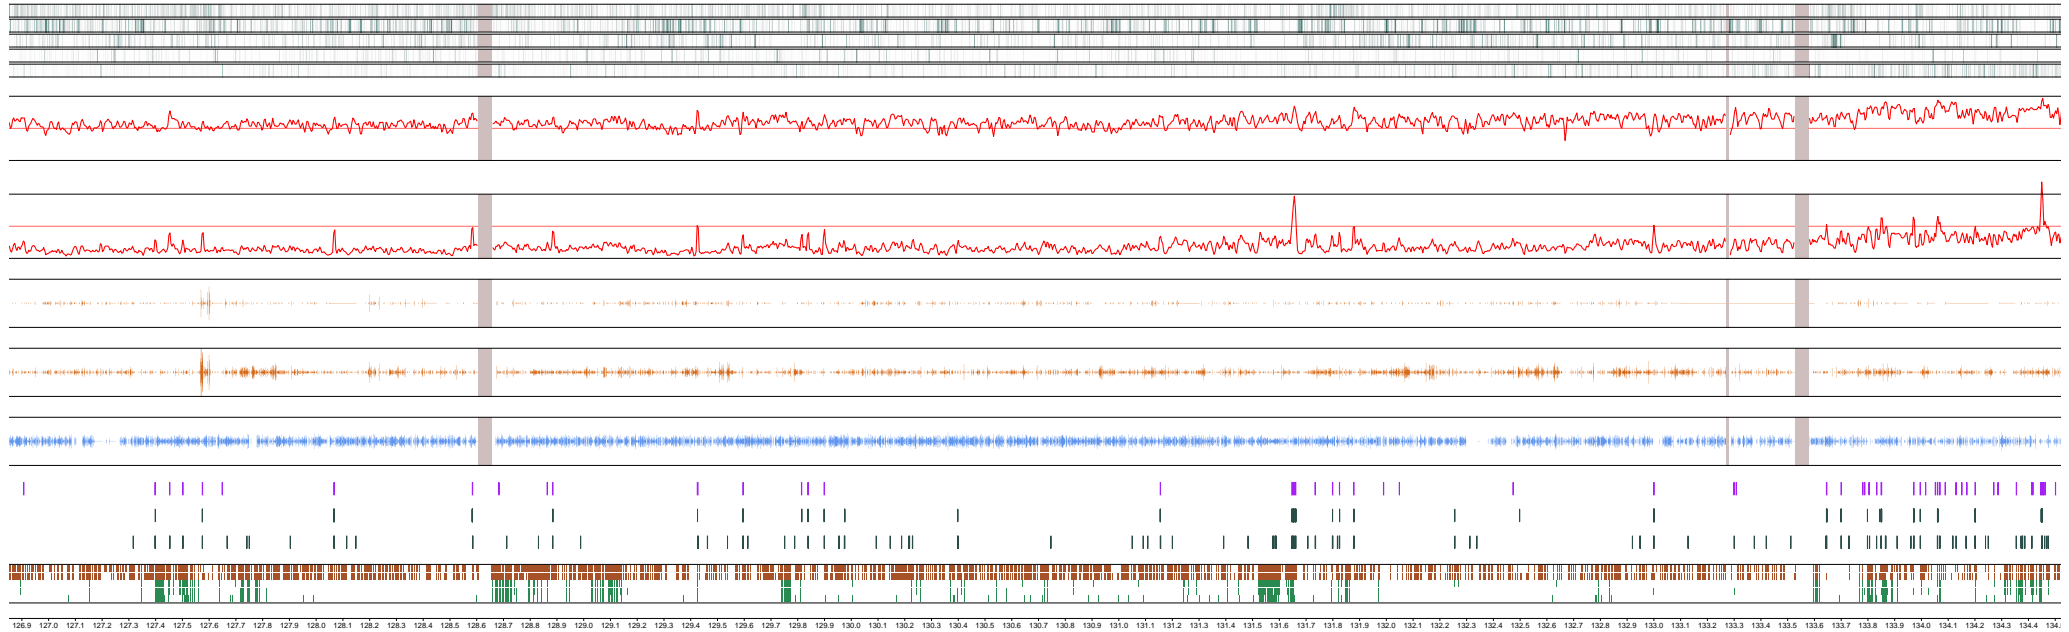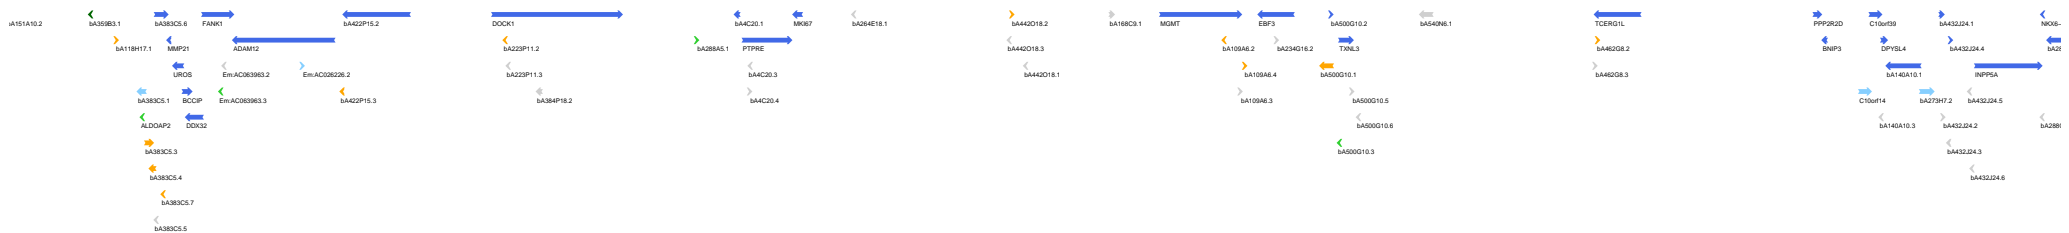

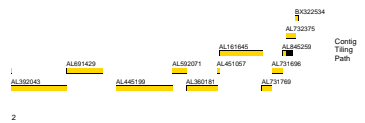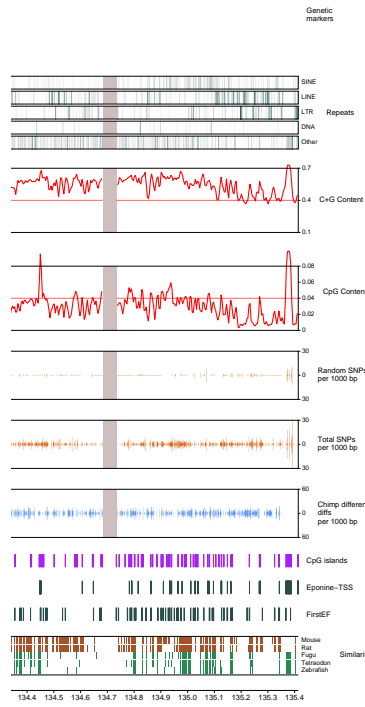

Clusters

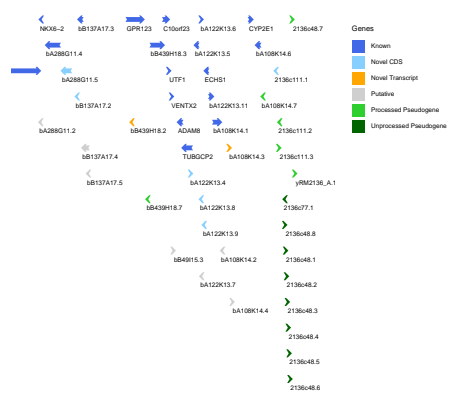

Supplement: 41586_2004_BFnature02462_MOESM6_ESM.pdf [file 41586_2004_BFnature02462_MOESM6_ESM.pdf]
